1 Risk Factors for COVID-19 versus non-COVID-19 related in-  
2 hospital and community deaths by Local Authority District in  
3 Great Britain

4 Samuel P Leighton\*†, Danielle J Leighton\*, James Herron, Rachel Upthegrove, Jonathan Cavanagh,  
5 Georgios Gkoutos, Breda Cullen, Pavan K Mallikarjun

6 \* SPL and DJL contributed equally and are joint first authors

7 †Corresponding author – [samuel.leighton@glasgow.ac.uk](mailto:samuel.leighton@glasgow.ac.uk)

8

9 Samuel P Leighton, Clinical Academic Fellow, Institute of Health and Wellbeing, University of  
10 Glasgow, UK

11 Danielle J Leighton, Clinical Lecturer, Institute of Neuroscience and Psychology, University of  
12 Glasgow, UK

13 James Herron, Clinical Lecturer, Institute of Health and Wellbeing, University of Glasgow, UK

14 Rachel Upthegrove, Professor of Psychiatry and Youth Mental Health, Institute for Mental Health,  
15 University of Birmingham, Birmingham, UK

16 Jonathan Cavanagh, Professor of Psychiatry (Immunology), Institute of Infection, Immunity and  
17 Inflammation, University of Glasgow, UK

18 Georgios Gkoutos, Professor of Clinical Bioinformatics, Institute of Cancer and Genomic Sciences,  
19 University of Birmingham, Birmingham, UK; Associate Director of Health Data Research UK,  
20 Midlands, UK

- 21 Breda Cullen, Senior Lecturer in Clinical Psychology (Mental Health & Wellbeing), Institute of Health  
22 & Wellbeing, University of Glasgow, UK
- 23 Pavan K Mallikarjun, Senior Clinical Lecturer, Institute for Mental Health, University of Birmingham,  
24 Birmingham, UK

## 25 Abstract

26

### 27 Objectives:

28 To undertake a preliminary hypothesis-generating analysis exploring putative risk factors for  
29 coronavirus disease 2019 (COVID-19) population-adjusted deaths, compared with non-COVID-19  
30 related deaths, at a local authority district (LAD) level in hospital, care homes and at home.

### 31 Design:

32 Ecological retrospective cohort study

### 33 Setting

34 Local authority districts (LADs) in England, Scotland and Wales (Great Britain (GB)).

### 35 Participants

36 All LAD deaths registered by week 16 of 2020.

### 37 Main Outcome Measures

38 Death registration where COVID-19 is mentioned as a contributing factor per 100,000 people in all  
39 settings, and in i) care homes, ii) hospitals or iii) home only, in comparison to non-COVID-19 related  
40 deaths.

### 41 Results

42 Across GB by week 16 of 2020, 20,684 deaths had been registered mentioning COVID-19, equivalent  
43 to 25.6 per 100,000 people. Significant risk factors for LAD COVID-19 death in comparison to non-  
44 COVID-19 related death were air pollution and proportion of the population who were female.  
45 Significant protective factors were higher air temperature and proportion of the population who  
46 were ex-smokers. Conversely, for all COVID-19 unrelated deaths in comparison to COVID-19 deaths,  
47 higher rates of communal living, higher population rates of chronic kidney disease, chronic  
48 obstructive pulmonary disease, cerebrovascular disease deaths under 75 and dementia were

49 predictive of death, whereas, higher rates of flight passengers was protective. Looking at individual  
50 settings, the most notable findings in care homes was Scotland being a significant risk factor for  
51 COVID-19 related deaths compared to England. For hospital setting, the proportion of the  
52 population who were from black and Asian minority ethnic (BAME) groups significantly predicted  
53 COVID-19 related death.

## 54 Conclusions

55 This is the first study within GB to assess COVID-19 related deaths in comparison to COVID-19  
56 unrelated deaths across hospital, care homes and home combined. As an ecological study, the  
57 results cannot be directly extrapolated to individuals. However, the analysis may be informative for  
58 public health policy and protective measures. From our hypothesis-generating analysis, we propose  
59 that air pollution is a significant risk factor and high temperature a significant protective factor for  
60 COVID-19 related deaths. These factors cannot readily be modelled at an individual level. Scottish  
61 local authorities and local authorities with a higher proportion of individuals of BAME origin are  
62 potential risk factors for COVID-19 related deaths in care homes and in hospitals, respectively.  
63 Altogether, this analysis shows the benefits of access to high quality open data for public  
64 information, public health policy and further research.

65

66

67

68

69

70

71

## 72 Introduction

73

74 The global coronavirus disease 2019 (COVID-19) crisis has presented the United Kingdom (UK) with  
75 an unprecedented challenge in the management and prediction of infection and mortality rates.

76 With the benefit of frequently updated open-access population health data, it is possible for  
77 researchers in the UK to identify regional influences of disease progression and outcome that,  
78 crucially, might help to model service provision in real-time.

79 Studies of disease trajectory related to COVID-19 have emerged over the past few weeks and have  
80 highlighted several demographic and clinical factors that influence outcome. Initial data from Wuhan  
81 suggested that increased age and presence of co-morbidities, in particular cardiovascular disease,  
82 predicted death (as compared with discharge) in a cohort of patients admitted to hospital with  
83 Severe Acute Respiratory Syndrome Coronavirus 2 (SARS-CoV-2) infection.[1,2] A meta-analysis of  
84 44,672 laboratory-confirmed cases in China confirmed these findings, and also highlighted the  
85 increased risk of death among men, with an equal rate of infection among males and females.[3]

86 In a series of 4103 patients in New York City, 48.7% were hospitalised, with age >65 and obesity  
87 most strongly predicting admission; tobacco use was an independent negative predictor of  
88 hospitalisation.[4] A further multivariable report of 16,749 patients from 166 UK hospitals (33%  
89 death rate) confirmed that increased age was strongly independently associated with death and that  
90 co-morbidities (in order of importance: dementia, obesity, chronic cardiac disease, chronic kidney  
91 disease (CKD), chronic obstructive pulmonary disease (COPD) and malignancy) were also  
92 independently associated with mortality.[5] Females were 20% less likely to die than males.  
93 However, the study did not control for ethnicity, smoking status, local population factors such as  
94 social deprivation, population density, population and goods movement, or ecological factors such  
95 as climate and pollution.

96 Risk factors for in-hospital deaths have also been explored using a large cohort of primary care  
97 patients in England[6]. Primary care linkage data permitted detailed analysis of past medical and  
98 demographic risk factors, which were studied in individual age and sex-adjusted models; significant  
99 variables were then incorporated into a multivariable model. Again, co-morbidities were considered  
100 to impart significant risk of death, as well as deprivation and being from Asian and black ethnicity  
101 minorities. Current smoking was found to be protective against death from COVID-19 but lost  
102 significance when adjusted for ethnicity.

103 Ethnicity has recently been identified as a research priority, following observations from the Institute  
104 of Fiscal Studies that COVID-19 related death rates of people of black, Asian and minority ethnic  
105 (BAME) origin are 2.5 times that of people of white ethnic origin in English hospitals. Exclusion of  
106 ethnicity data from some multivariable analyses thus far is a concerning omission.[7]

107 Ecological modelling suggests that ‘lived’, or perceived, population density, and climate are thought  
108 to modify the rate of transmission of SARS-CoV-2.[8,9] Moreover, direct links between air pollution  
109 and the severity of respiratory disease or inflammatory response in COVID-19 disease have been  
110 postulated in Northern Italy,[10] England[11] and the United States.[12] Cultural and behavioural  
111 variables are more difficult to study but, inevitably, local, domestic and international travel and  
112 transport[13,14] and public and cultural awareness[15] is thought to contribute to population  
113 spreading.

114 While respiratory failure is the most common cause of death of people with COVID-19 in hospital[1],  
115 evidence for an overwhelming burden of out-of-hospital deaths has emerged in the UK. Possible  
116 reasons for this include: i) recent proactivity from primary care providers in formalising ‘Do Not  
117 Attempt Resuscitation’ orders in care home residents and individuals over 70 with co-morbidities; ii)  
118 triaging of intensive care admissions; iii) expected deaths in those with co-morbidities with  
119 concomitant infection with SARS-CoV-2 being an “epiphenomenon”. [16] However, other

120 independent disease-specific or location-specific influences may contribute. Systematic analysis of  
121 risk factors for COVID-19 related deaths in the community is currently lacking.

122 Death rates in Great Britain are anticipated to be amongst the highest in Europe,[17] although  
123 variation in reporting of out-of-hospital deaths currently makes between-country comparisons  
124 difficult.[18] In light of ongoing fatalities, factors influencing survival may have broader public health  
125 implications and help to model services at a local authority level. Using publicly available aggregate  
126 Local Authority District (LAD) data, we undertook a multivariable, multivariate ecological study of  
127 SARS-CoV-2 infection related deaths in England, Scotland and Wales in hospitals, care homes and at  
128 home. We anticipated that these data would: i) generate further data-driven hypotheses regarding  
129 risk factors for death related to COVID-19 at a local authority level; ii) identify differences between  
130 risk factors for COVID-19 related deaths and deaths due to all other causes; and iii) identify risk  
131 factors specific to hospital, care home and at home COVID-19 related deaths.

132

### 133 Aim

134

135 To undertake a preliminary hypothesis-generating analysis to explore putative risk factors for novel  
136 coronavirus (COVID-19) population-adjusted death rates, compared with non-COVID-19 related  
137 deaths, at a local authority district (LAD) level in hospital, care homes and at home.

138

### 139 Methods

140

141 We adhered to the Strengthening the reporting of observational studies in epidemiology (STROBE)  
142 guidelines for the reporting of this observational study.[19]

143

#### 144 Sources of data

145 All data used in the present analysis is free, publicly available, and open source.

146

#### 147 *Outcome*

148 We used open-source government data for total English, Scottish and Welsh (hereafter referred to  
149 as Great Britain (GB)) death registrations mentioning COVID-19 by LAD for week 16 obtained from  
150 the Office for National Statistics (ONS) for England and Wales (registrations to 17<sup>th</sup> April 2020), and  
151 from the National Records of Scotland (NRS) for Scotland (registrations to 19<sup>th</sup> April 2020).[20,21]

152 The International Classification of Diseases, 10<sup>th</sup> Edition (ICD-10) definitions are as follows: COVID-19  
153 (U07.1 and U07.2).[22] At the time of analysis, Northern Ireland COVID-19 death registrations were  
154 not available at a LAD level. Deaths rates were adjusted for GB LAD population obtained from the  
155 ONS, per 100,000.[23] GB COVID-19 deaths per 100,000 by LAD were analysed altogether and  
156 separately by location – in hospital, care homes and at home. All LAD deaths (except COVID-19) were  
157 also analysed across the four settings by way of comparison.

158 Local authority district (LAD) level is the smallest division UK geographical area for which COVID-19  
159 death rates are publicly released. There are 317 LADs in England made up of 36 metropolitan  
160 boroughs, 32 London boroughs, 192 non-metropolitan districts, and 55 unitary authorities, as well as  
161 the City of London and the Isles of Scilly. Scotland has 32 LADs equivalent to council areas, and  
162 Wales has 22 LADs known as principal areas. In total, there are 371 GB LADs.

163

#### 164 *Putative Risk Factors*

165 Twenty-six putative risk factors for COVID-19 at a LAD level, obtained by literature search and by  
166 applying expert clinical knowledge, were included in the present analysis. These relate to country,



167 weather and air pollution; demographics and social influences; population disease rates and  
168 behaviours; transport and information behaviour. After dummy coding, this resulted in 27 variables.  
169 A literature search was conducted between 28<sup>th</sup> April and 4<sup>th</sup> May 2020 independently by SPL, DJL  
170 and PKM via Pubmed, Google and Twitter (given the very preliminary nature of the literature  
171 surrounding COVID-19 which is mainly available via expert opinion, government briefings and  
172 preprint servers), using the search terms “coronavirus” OR “COVID-19” AND “risk” or “risk factors”.

173

#### 174 *Country, Weather and Air Pollution*

175 The constitutive nation of GB that each LAD formed part of was included to reflect the devolved  
176 nature of health and social care.

177 Weather data for average daily maximum temperature and humidity by local authority was  
178 obtained from the Met Office[24] using coordinates provided the ONS Open Geography Portal[25]  
179 via the Dark Sky application programming interface (API) by Apple.[26] Data was averaged across  
180 daily data for four Sundays, 23<sup>rd</sup> February, 1<sup>st</sup>, 8<sup>th</sup> and 15<sup>th</sup> March 2020, because of limitations on the  
181 number of free API calls.

182 Air pollution data for population-weighted LAD 2018 mean total fine particulate matter (PM<sub>2.5</sub>) was  
183 obtained from the UK Government Department for Environment, Food and Rural Affairs.[27]

184

#### 185 *Demographics and Social Influences*

186 Median age, percentage of the population who are female, and population density (people per  
187 square kilometre) were obtained from ONS LAD population data.[23] The proportion of LAD  
188 population living in a communal establishment (including care homes, prisons, defence bases,  
189 boarding schools and student halls), proportion black, Asian and minority ethnic (including Jewish)  
190 people (BAME) and proportion living in households with more than 1.5 people per room was

191 obtained from 2011 Census data from the ONS for England and Wales,[28] and NRS for Scotland.[29]  
192 Deprivation level for each LAD was defined as the proportion of the LAD's lower super output areas  
193 (LSOAs) in the most deprived 10% of all the constituent nation's LADs using summary data provided  
194 by the 2019 English (EIMD2019), 2020 Scottish (SIMD2020) and the Welsh (WIMD2019) indices of  
195 multiple deprivation.[30–32] The proportion of care home residents self-funding – as a surrogate  
196 marker for community wealth – was obtained for England regions in 2017 via a House of Commons  
197 Library Briefing Paper and mapped to their LADs,[33] for Scottish LADs via the Care Home Census for  
198 Adults in Scotland (2017),[34] and for Wales via a 2015 Public Policy Institute for Wales report.[35]

199

#### 200 *Population Disease Rates and Behaviours*

201 For all health and illness LAD authority data, all LAD population prevalences were standardised  
202 within the constitutive GB nation, to account for differences in methodology and time of their  
203 measurement. Where data for a LAD was not available, health board (Scotland and Wales) or county  
204 (England) level data was mapped to LAD. Cancer rates were obtained for England as 'incidences of all  
205 cancers, standardised incidence ratio 2012 – 16' via Public Health England (PHE),[36] for Scotland as  
206 Quality Outcome Framework (QOF) 2015 prevalence via [gpcontract.co.uk](http://gpcontract.co.uk),[37] and for Wales as QOF  
207 2019 prevalence via StatsWales.[38] Chronic Obstructive Pulmonary Disease (COPD) rates were  
208 obtained for England as 'estimated prevalence of COPD (all ages) 2015' via PHE, and for Scotland and  
209 Wales via QOF, as above. For Chronic Kidney Disease (CKD) rates were obtained for England as 'CKD  
210 prevalence estimates for local and regional populations – 2015' via PHE, and for Scotland and Wales  
211 via QOF. For cardiovascular disease (CVD) age-standardised death rates per 100,000 for coronary  
212 heart disease under 75s by LAD 2015/17 were obtained for all GB LADs via the British Heart  
213 Foundation.[39] Diabetes rates were obtained for England as 'estimated prevalence of diabetes  
214 (undiagnosed and diagnosed) 2015', and for Scotland and Wales via QOF. Dementia rates were  
215 obtained for England as 'dementia: QOF prevalence (all ages) 2018/19' via PHE, and for Scotland and

216 Wales via QOF. Hypertension rates were obtained for England as ‘estimated prevalence of diagnosed  
217 hypertension (16+) 2015’ via PHE, and for Scotland and Wales via QOF. Obesity rates for England  
218 were obtained as ‘Obesity: QOF prevalence (18+) 2018/19’ via PHE, for Scotland via the Scottish  
219 Health Survey 2018,[40] and for Wales via the Welsh Health Survey 2015.[41] Rheumatoid Arthritis  
220 (RA) rates were obtained for England as ‘rheumatoid arthritis: QOF prevalence (16+) 2018/19’ via  
221 PHE, and for Scotland and Wales via QOF. Finally, current and ex-smoking rates were obtained for  
222 England via the GP Patient Survey on PHE, and for Scotland and Wales via their respective 2018 and  
223 2015 health surveys.

224

#### 225 *Transport and Information Behaviour*

226 Population standardised flight passengers to and from each LAD were obtained via the Civil Aviation  
227 Authority 2018 Passenger Survey, rounding down to the nearest 100,000 passengers per 100,000  
228 people. Where necessary, county-level figures were divided across their constituent LADs according  
229 to their relative populations.[42] Port activity statistics in tonnage were obtained from the UK  
230 Government’s Department for Transport and mapped to the port’s LAD for all Major Ports with an  
231 activity level greater than the largest Minor Port.[43] Lastly, Google search trend data – as a proxy  
232 marker for information-seeking behaviour and public awareness – were obtained from Google  
233 Trends for relative search volume for the term "Coronavirus" scaled by population per region (cities,  
234 towns and areas of London) mapped to LAD, averaged between 1<sup>st</sup> February to 19<sup>th</sup> March 2020.[44]

235

#### 236 **Sample Size Calculation**

237

238 Using Green’s method to calculate sample size for multiple ordinary least squares regression, we  
239 would require a minimum of 266 observations for 27 variables ( $50 + 8 \times \text{number of variables}$ ).[45]

240 We had outcome data for all 371 GB LADs, exceeding Green's criteria. Alternatively, using  
241 G\*Power,[46] at alpha 0.05 and power 0.80, the sample size and number of predictors is sufficient to  
242 detect an overall model effect size of  $f^2 = 0.07$  (equivalent to  $R^2 = 0.07$ ).

243

## 244 **Statistical Analysis**

245

### 246 *Univariate Analysis*

247 Country was dummy coded with England as the reference group. Independent variables were  
248 standardised to Z-scores. Missing data were handled by multiple imputation (chained equations  
249 using predictive mean matching with five nearest neighbours; five imputations) and estimates were  
250 pooled using Rubin's rules.[47] Pearson's correlation was assessed across the independent variables.  
251 Separate multivariable linear regression models with the same independent variables were fitted by  
252 ordinary least squares against two sets (COVID-19 deaths and all deaths except COVID-19) of four  
253 different dependent variables: LAD deaths per 100,000 people in all settings combined, care homes  
254 only, hospitals only, and, at home only. Coefficient estimates with 95% confidence intervals are  
255 reported, along with the model's adjusted  $R^2$ . Assumptions of homoscedasticity and normality of  
256 residuals were checked for each outcome model and found not to be violated. We also conducted a  
257 sensitivity analysis with robust standard errors which did not change the interpretation of the  
258 results.

259

### 260 *Multivariate Analysis*

261 To establish whether independent variables which were statistically significant in explaining COVID-  
262 19 LAD deaths in the univariate multiple regression were the same or different to independent  
263 variables which explained all LAD deaths (except those caused by COVID-19), a multivariate  
264 multivariable analyses (otherwise known as seemingly unrelated regression) was undertaken within

265 each of the four settings. That is, for each multivariate analysis, two dependent variables, LAD  
266 COVID-19 deaths per 100,000 and all LAD deaths (except COVID-19) per 100,000, were regressed  
267 against the same 27 standardised independent variables. A type II multivariate analysis of variance  
268 (MANOVA) was conducted to assess if the independent variables' coefficients remained significant in  
269 the multivariate multiple regression model via Pillai's trace. Then, the equality of each multivariate-  
270 significant independent variable's coefficient across the two dependent outcomes was tested using a  
271 Wald test, with the null-hypothesis being that the coefficient magnitude was equal for both  
272 dependent outcomes (i.e. two-tailed). Significance for the Wald tests was corrected for multiple  
273 comparisons by controlling for the false discovery rate. The dependent variables were standardised  
274 before performing the Wald tests, to enable a like-for-like comparison across coefficients, given that  
275 the outcome prevalence was much larger for deaths except COVID-19 than for COVID-19 deaths. As  
276 pooling across the five imputed datasets was not possible for the MANOVA analysis, this analysis  
277 and the Wald tests were based on the first imputed dataset only. Replicating the Wald tests with  
278 pooling across the five imputed datasets did not alter the interpretation.

279 All analyses were performed using R CRAN version 3.6.1[48] (with the 'broom',[49] 'car',[50]  
280 'mice',[51] 'multcomp',[52] 'systemfit'[53] and 'VIM'[54] packages). R code and pre-processed data  
281 are available [online](#). Raw data is available from the referenced sources.

282

## 283 Patient and Public Involvement

284

285 No patients were involved in setting the research question or the outcome measures, nor were they  
286 involved in the study design. No patients were involved in the interpretation or writing up of results.  
287 Results will be disseminated to the public via our respective universities.

288

289

## 290 Results

291

292 All LADs had complete outcome data. Eighteen of the independent variables had missing data with  
293 obesity having the highest percentage missing at 6.5%. Summary statistics for the variables chosen  
294 are openly available as referenced above. Across GB by week 16, there had been a total of 20,684  
295 deaths registered mentioning COVID-19 including 3,627 in care homes, 15,668 in hospitals and 1,050  
296 at home. **Figure 1** shows the population-weighted deaths per 100,000 for COVID-19 by week 16 for  
297 all settings across each LAD. Of the 371 GB LADs, Inverclyde had the highest reported COVID-19  
298 deaths per 100,000 across all settings at 97.2, while only the Isles of Scilly had no reported COVID-19  
299 deaths. **Supplementary Figure 1** shows the population-weighted deaths per 100,000 for all causes  
300 except COVID-19. **Table 1** summarises these numbers. **Figure 2** shows the univariate correlation  
301 matrix for the putative risk factor variables.

302 **Figure 3** summarises the results of the univariate multiple linear regression analyses for all settings  
303 for LAD COVID-19 deaths per 100,000 (**A**) and all LAD deaths (except COVID-19) (**B**). Significant  
304 predictors for COVID-19 related deaths at a local authority level included air pollution, deprivation,  
305 and proportion of the population who are female. In contrast, higher temperatures, dementia, ex-  
306 smokers and self-funding care were significantly protective factors against COVID-19 deaths. The  
307 adjusted  $R^2$  was 0.46 (95% CI 0.38, 0.53), with the model explaining 46% of the variance in the  
308 outcome. **Supplementary Figures 2-4** summarise the same analyses for care homes only, hospitals  
309 only and at home only, respectively.

310 **Table 2** shows the independent variables that were significant in the multivariable multivariate  
311 analysis of both dependent death outcomes (COVID-19 related versus all except COVID-19 related  
312 death rates) across all settings, along with the results of their Wald equality tests. These results

313 highlight significant differences between COVID-19 related and COVID-19 unrelated deaths after  
314 correcting for multiple comparisons ( $t$ ). The Wald test z-value shows the direction of significance  
315 (positive value indicating that the risk factor is more strongly associated with COVID-19 related  
316 deaths over COVID-19 unrelated deaths). Interpreting these data in the context of **Figures 3A** and  
317 **3B**, we can conclude that air pollution ( $p = 0.007$ ) and higher female population proportion ( $p =$   
318  $0.036$ ) are significant risk factors for COVID-19 related deaths at a local authority level compared  
319 with all deaths except those related to COVID-19. In contrast, higher temperatures ( $p = 0.004$ ) and a  
320 higher proportion of ex-smokers ( $p = 0.002$ ) are protective. Conversely, older median age ( $p =$   
321  $0.007$ ), higher rates of communal living ( $p < 0.001$ ), higher rates of CKD ( $p = 0.017$ ), COPD ( $p = 0.003$ ),  
322 CVD deaths ( $p < 0.001$ ) and dementia ( $p < 0.001$ ) are more significant risk factors for deaths that are  
323 unrelated to COVID-19 at a local authority level, whereas a higher number of flight passengers ( $p$   
324  $< 0.001$ ) is relatively protective. Female population proportion was also a risk factor for COVID-19  
325 unrelated death, but there was a significantly stronger association in the COVID-19 related death  
326 model.

327 **Supplementary Table 1** shows the significant results for the same multivariate analyses but the  
328 respective deaths in care homes, hospitals and at home separately. These can be interpreted in the  
329 context of **Supplementary Figures 2 – 4**. These data tell us that, relative to COVID-19 unrelated  
330 deaths, deaths related to COVID-19 in care homes are predicted by being in Scotland ( $p = 0.008$ );  
331 however, a higher proportion of ex-smokers ( $p < 0.001$ ) remains protective. Relative to COVID-19  
332 related deaths, COVID-19 unrelated deaths in care homes are associated with higher median age ( $p$   
333  $= 0.005$ ) and higher rates of communal living ( $p < 0.001$ ), CKD ( $p = 0.026$ ) and dementia ( $p < 0.001$ ),  
334 but being in Wales ( $p = 0.028$ ) is a protective factor.

335 Relative to deaths in hospital that are unrelated to COVID-19, COVID-19 related deaths in hospital  
336 are higher in LADs with a higher population proportion of BAME origin ( $p = 0.006$ ) and higher  
337 proportion of women ( $p = 0.006$ ), whereas higher rates of communal living ( $p = 0.021$ ), self-funding

338 care homes ( $p = 0.019$ ) and dementia ( $p = 0.016$ ) are relatively protective. Risk factors for COVID-19  
339 unrelated deaths in hospital (relative to COVID-19 related deaths) are being in Scotland ( $p = 0.012$ )  
340 and Wales ( $p < 0.001$ ), as well as higher population prevalence of CKD ( $p = 0.002$ ), COPD ( $p = 0.004$ ),  
341 CVD deaths ( $p < 0.001$ ) and current smoking ( $p = 0.020$ ). Air pollution is a significant risk factor for  
342 both COVID-19 related and COVID-19 unrelated deaths in hospital but is significantly more strongly  
343 associated with COVID-19 related deaths ( $p = 0.015$ ), in-keeping with the results for all combined  
344 settings.

345 Finally, compared with COVID-19 unrelated deaths, COVID-19 death rates at home are higher in  
346 LADs with a greater female population proportion ( $p = 0.023$ ), whereas higher temperatures ( $p =$   
347  $0.001$ ) and rates of CVD deaths ( $p = 0.004$ ) are relatively protective at the LAD level. COVID-19  
348 unrelated deaths at home (relative to COVID-19 deaths) are more strongly associated with humidity  
349 ( $p = 0.020$ ) and higher rates of hypertension ( $0.025$ ), whereas higher rates of cancer ( $p = 0.016$ ) and  
350 flight passengers ( $p = 0.013$ ) are relatively protective.

351

## 352 Discussion

353

### 354 All Combined Setting Models

355

356 In this study of risk factors for COVID-19 related deaths, we have generated explanatory  
357 multivariable regression models using the most granular publicly available demographic and  
358 ecological data in Great Britain. In contrast with previously published population studies during this  
359 pandemic period, we have incorporated both hospital and community death rates across Scotland,  
360 England and Wales. Beyond simply identifying significant predictors of COVID-19 related deaths in a  
361 multivariable model adjusted for all putative confounders, we have presented this in the context of



362 all GB deaths excluding those related to COVID-19 to identify factors which are significantly unique  
363 to COVID-19, thereby minimising over-interpretation of our models and potential collider bias.[55]

364 From our data, we propose that air pollution (PM<sub>2.5</sub> exposure) is the single biggest risk factor for  
365 COVID-19 related deaths at a local authority level. In all settings combined, a 1SD increment in  
366 population-weighted annual mean PM<sub>2.5</sub> (equivalent to 2.00  $\mu\text{g}/\text{m}^3$ ) was associated on average  
367 with eight additional deaths per 100,000. A study from the United States similarly looked at PM<sub>2.5</sub>  
368 exposure, controlling for 20 potential confounding variables, and found that a small increase in long-  
369 term fine particulate exposure (1  $\mu\text{g}/\text{m}^3$ ) was associated with a significant increase in COVID-19  
370 related death rates (8%).[12] Air pollution causes immune and inflammatory changes both within  
371 the lung and systemically, which may be particularly relevant to the excess death rate in COVID-  
372 19.[56] Air pollution is also significantly detrimental in the model of COVID-19 unrelated deaths, but  
373 the magnitude of the effect is significantly greater in the COVID-19 model (**Table 2**). Interestingly,  
374 our results show that air pollution is significantly positively correlated with higher temperatures  
375 (**Figure 2**). However, a higher temperature is significantly protective against COVID-19 deaths in our  
376 models – a factor which has been suggested previously and demonstrated in the first SARS-CoV  
377 pandemic.[57]

378 In spite of consistent evidence showing that being male is a risk factor for in-hospital COVID-19  
379 related deaths, we have shown that, at the LAD level, a higher female population proportion imparts  
380 a significantly greater risk. This highlights the importance of careful interpretation of this ecological  
381 study: the observation is not related to the rate of female deaths but rather indicates that more  
382 deaths overall occur in LAD areas in which more women reside. The underlying relationship between  
383 this population-level finding and the observed greater risk of COVID-19 related death among men at  
384 the individual level is likely to be complex. A potential explanation might be that women are more  
385 likely to be asymptomatic carriers and perpetuate the spread of disease in communities. Indeed, in a  
386 study of all women being admitted to an obstetric unit in New York, 88% of all women positive for

387 SARS-CoV-2 were asymptomatic.[58] Women are also more likely to be employed in care-giving roles  
388 and involved in direct community infection control measures, such as at testing centres, and this  
389 may be a further potential route of transmission.[59]

390 We observe that a higher rate of ex-smokers in the population is associated with a lower rate of  
391 COVID-19 related deaths at the LAD level. Current smoking is not significant in the all combined  
392 settings model, but the coefficient is still negative (**Figure 3A**). While this observation may seem  
393 counterintuitive in the context of a respiratory infection, it confirms previous similar findings.[60]  
394 Researchers in France have found that smokers were significantly less likely to develop a  
395 symptomatic or severe infection from SARS-CoV-2.[61] One possible theory is that nicotine  
396 depresses expression of angiotensin-converting enzyme 2 receptors (the functional receptor for  
397 SARS-CoV-2)[61], though this effect might be attenuated over time in the case of ex-smokers. Other  
398 hypotheses may relate to immunomodulation via nicotinic acetylcholine receptors, leading to  
399 decreased production of pro-inflammatory cytokines and chemokines, thereby dampening local  
400 inflammation; this mechanism has been suggested in ulcerative colitis where smoking is a known  
401 protective factor.[62] The older median age in the LAD is a significant predictor of death only in the  
402 model with all deaths excluding those related to COVID-19. Older age has previously been shown to  
403 be a significant predictor of in-hospital COVID-19 related deaths.[5,60,63] In view of the aggregate  
404 nature of our results, they do not contradict this but rather highlight that, compared to deaths in  
405 LADs from all other causes, COVID-19 disease also raises the risk of death in younger people.

406 While population prevalence of other illnesses (CKD, COPD, CVD deaths and dementia) were  
407 significant predictors of COVID-19 unrelated deaths, these were not significantly associated with  
408 outcome in the COVID-19 model. Again, this cannot be extrapolated to individual patient risk but  
409 does suggest that SARS-CoV-2 related deaths are not patterned according to chronic disease  
410 prevalence at the LAD level compared with deaths from other causes. It is also possible that SARS-  
411 CoV-2 infection contributed to all-cause deaths, driven by these risk factors, without these deaths

412 being laboratory-confirmed or COVID-19 suspected and entered on the death certificate.  
413 Alternatively it may be that individuals with a high burden of disease have experienced excess  
414 deaths in the context of reduced general healthcare provision due to scaling back of services during  
415 the pandemic and public concerns about accessing healthcare. Future research should focus on  
416 'excess mortality' which is the number of deaths recorded during the present pandemic above the  
417 level we would have expected under 'normal' conditions and would capture all deaths caused by  
418 COVID-19, not just those suspected and registered.[64] At the time of analysis, these data was not  
419 available at a local authority level.

420 LADs with higher levels of recorded flight passengers have lower death rates for all deaths except  
421 those related to COVID-19. This is correlated with population density and is negatively correlated  
422 with median age and so may reflect a younger, more active population. This protective effect is not  
423 seen in the COVID-19 model, perhaps due to a detrimental influence of flight activity on population  
424 movement and spread in the context of this highly transmissible disease.

425 Contrary to expectations of a highly contagious disease, population rates of communal living did not  
426 significantly associate with COVID-19 related deaths and, if anything, had a negative coefficient. On  
427 exploring this further, we note that communal living includes those in protected settings where  
428 perhaps strict social distancing measures can be implemented. Further, of the 1.8% of the GB  
429 population that reported living in a communal setting, only 31.2% were over the age of 65; the  
430 biggest contribution was from 16-24 year olds (39.2%). This group have among the lowest risk of  
431 COVID-19 death. Again, there may be an ecological explanation for this apparent anomaly – the  
432 highly mobile nature of the 16-24 year old population who are mostly in education may have meant  
433 that on the institution of the national lockdown, these groups returned 'home' to their local  
434 authority of origin where they had resided prior to entering education (e.g. to their parent or  
435 guardian's accommodation). This would deflate the actual population for the LAD in which the  
436 communal living establishment was based without altering the denominator population-based on

437 mid-2018 estimates and thus leading to a lowered death rate per 100,000 than would otherwise be  
438 expected.

439 Deprivation prevalence at the LAD level is a risk factor for COVID-19 deaths and COVID-19 unrelated  
440 deaths, but there is no statistical difference between the two, suggesting that it is not a factor  
441 unique to COVID-19. A higher rate of care home self-funding is strongly negatively correlated with  
442 LAD deprivation and, indeed, appears to be protective against COVID-19 related deaths (though,  
443 again, this is not significantly different relative to COVID-19 unrelated deaths).

444 While it has been noted that many people of BAME origin have died from COVID-19 disease, we find  
445 that having a higher proportion of BAME residents at the LAD level does not significantly associate  
446 with COVID-19 related deaths in the combined settings model. This may reflect the larger urban  
447 setting of BAME people and the correlated risks of air pollution and flight passenger numbers, which  
448 we accounted for in our analyses.

449

## 450 Care Home, Hospital and Home Setting Models

451

452 Examination of settings separately highlighted setting-specific features. In the care home setting,  
453 Scotland LADs were significantly associated with COVID-19 related deaths, compared with those in  
454 England. Further investigation may elucidate reasons behind this observation, perhaps related to  
455 policy differences on criteria for hospital admissions. Rising death rates in Scottish care homes has  
456 recently prompted specific intervention from the Scottish Government.[65] In the care home setting,  
457 dementia is a significant risk factor for COVID-19 unrelated deaths only, suggesting that SARS-CoV-2  
458 infection is not dependent on this factor. While not reaching significance in the all combined settings  
459 models, LADs with a higher proportion of people of BAME origin have significantly more COVID-19  
460 related hospital deaths, in-keeping with publicised figures.[66,67] As higher proportions of BAME

461 individuals is strongly positively correlated with population density and negatively correlated with  
462 higher median age, we hypothesise that younger people living in urban areas are more likely to  
463 receive hospital-level care. We also observe that air pollution and a higher proportion of females in  
464 the LAD are also strongly associated with hospital COVID-19 deaths. Hospital deaths are the biggest  
465 contributor to all COVID-19 related deaths and so these findings are understandably similar to those  
466 in the combined settings model. Dementia is a relative protective factor for COVID-19 related  
467 hospital deaths, perhaps suggesting that individuals with dementia are less likely to be admitted to  
468 hospital. Finally, in a home setting, as with the combined model, LADs with a higher level of flight  
469 passengers have lower death rates for COVID-19 unrelated deaths but not for COVID-19 related  
470 deaths. Again, this may suggest an influence of movement of young and mobile individuals returning  
471 home from other countries or regions on SARS-CoV-2 transmission.

472

## 473 Limitations

474

475 We have reported aggregate data related to local authorities in GB. We acknowledge that such data  
476 should not be used to make inferences about individual outcomes (the ecological fallacy). Indeed,  
477 one recent study observed that living further from the European Union headquarters was  
478 associated with reduced risk of SARS-CoV-2 infection[68]. However, ecological studies do allow us to  
479 make inferences about population for public health intervention and are important for hypothesis  
480 generation.[69] Further, our study may provide clarity regarding some factors which are only  
481 relevant at a local or population level when controlled for societal confounders, such as pollution  
482 and climate.[69]

483 In multivariable models such as ours in which all predictors are modelled together, the  
484 interpretation that each predictor is 'mutually adjusted' for the others is problematic when some  
485 predictors in fact form a mediating pathway towards the outcome. Although we have identified

486 certain risk and protective factors whose association with the outcome is statistically significant even  
487 when other covariates are in the model, we have not attempted to conceptualise these in a causal  
488 order. Future research using individual-level data should consider plausible hypotheses to be tested  
489 in path models, to identify the likely temporal order of risk factors and the optimum point along the  
490 path at which an intervention could be targeted.

491 If data regarding a predictor was available, and measured in the same way at a GB-wide level, this  
492 was used. Unfortunately, many of the putative predictor variables were recorded differently and at  
493 different times, in the constituent nations of GB. To try to offset these differences, such predictors  
494 were z-transformed within the constituent nation prior to their combination across nations. This  
495 assumes that the mean and standard deviation of the predictor is similar within each nation. For  
496 certain variables, for example deprivation, we know this to be untrue. Deprivation levels have been  
497 found to be similar in Scotland and England, but relatively higher in Wales.[70]

498 Further, occupational risk factors were not included in this analysis. ONS Occupational Coding does  
499 not provide sufficient detail to make assumptions about specific occupational exposure and it was  
500 not possible to take into account the effects of furlough. Occupation may influence some of our  
501 observations – for example, females are more likely to be employed in caring professions which may  
502 perpetuate spreading of SARS-CoV-2.

503 Our study can be compared with that of the OpenSAFELY Group, who studied individual patient data  
504 derived from primary care and linked hospital records, facilitating more accurate stratification of  
505 patients by past medical history and demographic parameters[6]. While this study benefited from  
506 better individual patient granularity, the platform only captures 40% of the population of England  
507 and examines in-hospital deaths only. Our study, in contrast, is inclusive of all LADs in England,  
508 Scotland and Wales and, uniquely, is informative regarding community death rates.

509 A number of our references relate to pre-prints and non-academic sources, as is to be expected in  
510 the context of this rapidly evolving pandemic. While these need to be interpreted with caution, the

511 wealth of information available is testament to the combined efforts and transparency of our  
512 research communities and associated open-access data.

513

## 514 Conclusions

515

516 From this ecological study of risk factors related to COVID-19 related deaths in GB, we have  
517 identified significant predictors of death rates in LADs in COVID-19 related cases, in direct  
518 comparison with cases not related to COVID-19. We have examined death rates across all hospital  
519 and community settings, both combined and separately, and have highlighted factors that appear  
520 more relevant in specific settings. We can now hypothesise that air pollution and a higher proportion  
521 of females at the local authority level are significantly associated with COVID-19 related deaths. The  
522 former is strongly associated and should prompt further studies of individual risk. The latter may  
523 relate to asymptomatic carrier status. In contrast to COVID-19 unrelated deaths, COVID-19 related  
524 deaths do not seem to be patterned by other illnesses or co-morbidities. Air temperature is  
525 protective against COVID-19 deaths at a LAD level. Emergence of data regarding COVID-19 death  
526 rate decline in different climates may further elucidate this observation. Ex-smoking appears to  
527 protective factor, perhaps related to its modifications on the immune system; clinical trials of  
528 immunomodulatory agents are in progress.[71] In specific settings, exploration of reasons behind  
529 Scottish care home COVID-19 related deaths and BAME-associated hospital COVID-19 deaths is  
530 merited. We anticipate that this comprehensive examination of community and in-hospital data  
531 across GB will provide direction for regional and setting-specific research priorities.

532

533

534 **Summary Box**

535

**What is already known on this topic**

- The novel SARS-CoV-2 virus has presented Great Britain with an unprecedented challenge in the management and prediction of infection and mortality rates.
- Several individual risk factors for COVID-19 disease mortality have been postulated, including male sex, age, pollution, co-morbidity and ethnicity.
- The influence and interactions of these factors across Great Britain, and in different care settings, is unknown. Relationship of these factors to deaths unrelated to COVID-19 have also yet to be explored.

**What this study adds**

- In this ecological study of local authority death rates, air pollution was a significant risk factors for mortality from COVID-19 across all care settings. Air temperature, however, was protective.
- Local authority being in Scottish was a significant risk factor for COVID-19 related deaths in the care home setting.
- Local authority having a higher proportion of people from black, Asian and minority ethnic groups was a significant risk factor for COVID-19 related deaths in the hospital setting.
- This study highlights the value of open access data in driving research and informing public policy.

536



## 537 Funding Sources

538 SPL is funded by a Clinical Academic Fellowship from the Chief Scientist Office, Scotland (CAF/19/04).

539 JC is funded by the Wellcome Trust (104025/Z/14/Z). The funders had no direct role in this study.

540

## 541 Ethics Statement

542 Ethical approval was not required for this ecological study utilising open data sources.

543

## 544 Transparency Statement

545 SPL conceptualised, analysed the data and wrote the manuscript. DJL analysed the data and wrote

546 the manuscript. JH, RU, JC and GG critically evaluated and revised the manuscript. BC and PKM

547 analysed the data and critically evaluated and revised the manuscript. The corresponding author

548 attests that all listed authors meet authorship criteria and that no others meeting the criteria have

549 been omitted. This publication is the work of the authors who will serve as guarantors for the

550 contents of this paper.

551

## 552 Conflicts of Interest

553 The authors have no conflicts to declare.

## 554 Figure Legends

555

556 **Figure 1:** Local Authority District (LAD) COVID-19 deaths per 100,000 people across Great Britian  
557 (GB). Data sources: Office for National Statistics (ONS) and National Records of Scotland (NRS).

558

559 **Figure 2:** Correlation heatmap (Pearson's) of putative Local authority risk factors for COVID-19  
560 related deaths. Significance levels: \* 0.05-0.01, \*\* <0.01-0.001, \*\*\*<0.001.

561

562 **Figure 3A:** Forest plot of standardised regression coefficients for Local Authority District (LAD)  
563 COVID-19 deaths per 100,000 of the population in all settings (care home, hospital and home) with  
564 95% confidence intervals (CI). Significance levels: \* 0.05-0.01, \*\* <0.01-0.001, \*\*\*<0.001.

565

566 **Figure 3B:** Forest plot of standardised regression coefficients for Local Authority District (LAD) for all  
567 deaths per 100,000 of the population except those related to COVID-19 in all settings (care home,  
568 hospital and home) with 95% confidence intervals (CI). Significance levels: \* 0.05-0.01, \*\* <0.01-  
569 0.001, \*\*\*<0.001.

570

571

572

573

574

575

576 **Tables**

577 **Table 1:** Summary of Death Rates Across Each Setting

| <b>Setting</b> | <b>COVID-19 LAD deaths per 100,000 people by week 16</b><br><i>Mean (SD)</i><br><i>Median (quartile 1, quartile 3); Range</i> | <b>All LAD deaths (except COVID-19) per 100,000 people by week 16</b><br><i>Mean (SD)</i><br><i>Median (quartile 1, quartile 3); Range</i> |
|----------------|-------------------------------------------------------------------------------------------------------------------------------|--------------------------------------------------------------------------------------------------------------------------------------------|
| All Combined   | 25.6 (15.6)<br>27.8 (18.9, 37.7); 0 to 97.2                                                                                   | 337.0 (72.1)<br>341.4 (298.6, 383.0); 109.5 to 516.5                                                                                       |
| Care Homes     | 5.3 (4.9)<br>4.3 (2.0, 7.0); 0 to 29.2                                                                                        | 85.5 (29.2)<br>84.9 (66.9, 105.6); 11.3 to 192.0                                                                                           |
| Hospitals      | 22.3 (12.8)<br>19.8 (13.2, 28.3); 0 to 78.0                                                                                   | 142.0 (33.2)<br>144.2 (119.9, 164.9); 18.0 to 232.1                                                                                        |
| At Home        | 1.5 (1.5)<br>1.1 (0, 2.0); 0 to 11.5                                                                                          | 87.9 (25.9)<br>85.6 (72.9, 101.5); 0 to 279.4                                                                                              |

578 LAD = Local Authority District.

579 **Table 2:** Comparison of Risk Factors for LAD Deaths from COVID-19 and Deaths Except COVID-19, in  
 580 All Settings Combined

| Setting      | Significant Variables on Multivariate Analysis via MANOVA | Type II MANOVA via Pillai's Trace<br>F(2,342)<br>P-value | Wald Test<br>H <sub>0</sub> = no difference in magnitude of coefficient between models (model 1 β – model 2 β = 0)<br><br>Model 1: COVID-19 LAD deaths<br>Model 2: All LAD deaths (except COVID-19) |
|--------------|-----------------------------------------------------------|----------------------------------------------------------|-----------------------------------------------------------------------------------------------------------------------------------------------------------------------------------------------------|
| All Combined | Scotland cf. England                                      | F = 6.61<br>p = 0.002                                    | z = -1.05<br>p = 0.296                                                                                                                                                                              |
|              | Wales cf. England                                         | F = 10.09<br>p <0.001                                    | z = -1.09<br>p = 0.274                                                                                                                                                                              |
|              | Air Pollution (PM <sub>2.5</sub> )                        | F = 11.06<br>p <0.001                                    | z = 2.71<br>p = 0.007†                                                                                                                                                                              |
|              | Temperature                                               | F = 6.27<br>p = 0.002                                    | z = -2.91<br>p = 0.004†                                                                                                                                                                             |
|              | Median Age                                                | F = 22.40<br>p <0.001                                    | z = -2.71<br>p = 0.007†                                                                                                                                                                             |
|              | Communal Living Proportion                                | F = 17.47<br>p <0.001                                    | z = -4.61<br>p <0.001†                                                                                                                                                                              |
|              | Deprivation Level                                         | F = 10.39<br>p <0.001                                    | z = 1.82<br>p = 0.068                                                                                                                                                                               |
|              | Proportion Female                                         | F = 9.61<br>p <0.001                                     | z = 2.10<br>p = 0.036†                                                                                                                                                                              |

|                                   |                        |                         |
|-----------------------------------|------------------------|-------------------------|
| CKD Rates                         | F = 12.40<br>p < 0.001 | z = -2.39<br>p = 0.017† |
| COPD Rates                        | F = 7.54<br>p < 0.001  | z = -2.95<br>p = 0.003† |
| CVD Deaths (under 75 years)       | F = 12.59<br>p < 0.001 | z = -4.01<br>p < 0.001† |
| Dementia Rates                    | F = 14.36<br>p < 0.001 | z = -4.65<br>p < 0.001† |
| Ex-Smoker Proportion              | F = 5.01<br>p = 0.007  | z = -3.16<br>p = 0.002† |
| Flight Passengers to and from LAD | F = 8.10<br>p < 0.001  | z = 3.34<br>p < 0.001†  |
| Self-Funding Care Home Rates      | F = 3.80<br>p = 0.023  | z = -1.66<br>p = 0.097  |

581

582 Comparison of Risk Factors for LAD Deaths from COVID-19 and Deaths Except COVID-19, in All  
 583 Settings Combined. The independent variables that were found to be significant in the multivariate  
 584 multiple regression model MANOVA are presented. For these significant variables only, the  
 585 equivalence of the variable's coefficient was tested across both outcome models via a Wald test. If  
 586 the z value is positive, the independent variable is a relatively stronger risk factor for COVID-19  
 587 deaths (Model 1) compared to all deaths except COVID-19 (Model 2), or is more protective against  
 588 all deaths except COVID-19. If the z value is negative, the variable is a relatively stronger risk factor  
 589 for all deaths except COVID-19, or is more protective against COVID-19 deaths. For the Wald tests, †  
 590 indicates significance adjusted for multiple comparisons. The MANOVA p-values do not require  
 591 adjustment for multiple comparisons.

592 CKD = chronic kidney disease; COPD = chronic obstructive pulmonary disease; CVD = cardiovascular

593 disease; LAD = Local Authority District; MANOVA = multivariate analysis of variance; PM = particulate

594 matter.

595

596

## 597 References

- 598 1. Ruan Q, Yang K, Wang W, Jiang L, Song J. Clinical predictors of mortality due to COVID-19  
599 based on an analysis of data of 150 patients from Wuhan, China. *Intensive Care Medicine*.  
600 Nature Publishing Group; 2020. p. 1.
- 601 2. Du RH, Liang LR, Yang CQ, Wang W, Cao TZ, Li M, et al. Predictors of Mortality for Patients  
602 with COVID-19 Pneumonia Caused by SARS-CoV-2: A Prospective Cohort Study. *Eur Respir J*.  
603 2020 Apr;
- 604 3. Deng G, Yin M, Chen X, Zeng F. Clinical determinants for fatality of 44,672 patients with  
605 COVID-19. *Crit Care*. 2020 Dec;24(1):179.
- 606 4. Petrilli CM, Jones SA, Yang J, Rajagopalan H, O'Donnell LF, Chernyak Y, et al. Factors  
607 associated with hospitalization and critical illness among 4,103 patients with COVID-19  
608 disease in New York City. *medRxiv*. 2020 Apr;2020.04.08.20057794.
- 609 5. Docherty AB, Harrison EM, Green CA, Hardwick HE, Pius R, Norman L, et al. Features of  
610 16,749 hospitalised UK patients with COVID-19 using the ISARIC WHO Clinical  
611 Characterisation Protocol. *medRxiv*. 2020 Apr;2020.04.23.20076042.
- 612 6. Collaborative TO, Williamson E, Walker AJ, Bhaskaran KJ, Bacon S, Bates C, et al. OpenSAFELY:  
613 factors associated with COVID-19-related hospital death in the linked electronic health  
614 records of 17 million adult NHS patients. *medRxiv*. 2020 May;2020.05.06.20092999.
- 615 7. Pareek M, Bangash MN, Pareek N, Pan D, Sze S, Minhas JS, et al. Ethnicity and COVID-19: an  
616 urgent public health research priority. *Lancet*. 2020 May;395(10234):1421–2.
- 617 8. Babbitt D, Garland P, Johnson O. Lived population density and the spread of COVID-19. 2020  
618 May;
- 619 9. Araujo MB, Naimi B. Spread of SARS-CoV-2 Coronavirus likely to be constrained by climate.

- 620 medRxiv. 2020 Apr;2020.03.12.20034728.
- 621 10. Conticini E, Frediani B, Caro D. Can atmospheric pollution be considered a co-factor in  
622 extremely high level of SARS-CoV-2 lethality in Northern Italy? *Environ Pollut.* 2020  
623 Jun;261:114465.
- 624 11. Travaglio M, Popovic R, Yu Y, Leal N, Martins LM. Links between air pollution and COVID-19 in  
625 England. medRxiv. 2020 Apr;2020.04.16.20067405.
- 626 12. Wu X, Nethery RC, Sabath BM, Braun D, Dominici F. Exposure to air pollution and COVID-19  
627 mortality in the United States: A nationwide cross-sectional study. medRxiv. 2020  
628 Apr;2020.04.05.20054502.
- 629 13. Li R, Pei S, Chen B, Song Y, Zhang T, Yang W, et al. Substantial undocumented infection  
630 facilitates the rapid dissemination of novel coronavirus (SARS-CoV-2). *Science.* 2020  
631 May;368(6490):489–93.
- 632 14. Lai S, Bogoch I, Ruktanonchai N, Watts A, Lu X, Yang W, et al. Assessing spread risk of Wuhan  
633 novel coronavirus within and beyond China, January-April 2020: a travel network-based  
634 modelling study. medRxiv. 2020 Mar;2020.02.04.20020479.
- 635 15. van Bavel JJ, Baicker K, Boggio PS, Capraro V, Cichocka A, Cikara M, et al. COVID-19 pandemic  
636 response. *Nat Hum Behav.* 2020 Apr;1–12.
- 637 16. Vincent J-L, Taccone FS. Understanding pathways to death in patients with COVID-19. *Lancet*  
638 *Respir Med.* 2020;0(0).
- 639 17. Office for National Statistics. Deaths registered weekly in England and Wales, provisional.  
640 Office for National Statistics. 2020.
- 641 18. Keiger J. It's a mistake to compare our Covid death toll with Spain and France. *The Spectator*  
642 [Internet]. 2020 May 1 [cited 2020 May 14]; Available from:



- 643 <https://www.spectator.co.uk/article/it-s-a-mistake-to-compare-our-covid-deaths-with-spain->  
644 [and-france](https://www.spectator.co.uk/article/it-s-a-mistake-to-compare-our-covid-deaths-with-spain-)
- 645 19. Elm E von, Altman DG, Egger M, Pocock SJ, Gøtzsche PC, Vandenbroucke JP. Strengthening  
646 the reporting of observational studies in epidemiology (STROBE) statement: guidelines for  
647 reporting observational studies. *BMJ*. 2007 Oct;335(7624):806–8.
- 648 20. Office for National Statistics. Deaths registered weekly in England and Wales, provisional:  
649 week ending 17 April 2020. Release date: 28 April 2020. [Internet]. 2020 [cited 2020 May 6].  
650 Available from:  
651 <https://www.ons.gov.uk/peoplepopulationandcommunity/birthsdeathsandmarriages/deaths>  
652 [/bulletins/deathsregisteredweeklyinenglandandwalesprovisional/weekending17april2020](https://www.ons.gov.uk/peoplepopulationandcommunity/birthsdeathsandmarriages/deaths/bulletins/deathsregisteredweeklyinenglandandwalesprovisional/weekending17april2020)
- 653 21. National Records of Scotland. Deaths involving coronavirus (COVID-19) in Scotland: Week 16  
654 (13 April 2020 to 19 April 2020). Release date: 22 April 2020. [Internet]. 2020 [cited 2020 May  
655 6]. Available from: [https://www.nrscotland.gov.uk/statistics-and-data/statistics/statistics-by-](https://www.nrscotland.gov.uk/statistics-and-data/statistics/statistics-by-theme/vital-events/general-publications/weekly-and-monthly-data-on-births-and-deaths/deaths-involving-coronavirus-covid-19-in-scotland/archive)  
656 [theme/vital-events/general-publications/weekly-and-monthly-data-on-births-and-](https://www.nrscotland.gov.uk/statistics-and-data/statistics/statistics-by-theme/vital-events/general-publications/weekly-and-monthly-data-on-births-and-deaths/deaths-involving-coronavirus-covid-19-in-scotland/archive)  
657 [deaths/deaths-involving-coronavirus-covid-19-in-scotland/archive](https://www.nrscotland.gov.uk/statistics-and-data/statistics/statistics-by-theme/vital-events/general-publications/weekly-and-monthly-data-on-births-and-deaths/deaths-involving-coronavirus-covid-19-in-scotland/archive)
- 658 22. The World Health Organization. ICD-10<sup>2</sup>: international statistical classification of diseases and  
659 related health problems<sup>2</sup>: tenth revision, 2nd ed [Internet]. 2004. Available from:  
660 <https://apps.who.int/iris/handle/10665/42980>
- 661 23. Office for National Statistics. Population estimates for the UK, England and Wales, Scotland  
662 and Northern Ireland - Office for National Statistics: mid-2018 [Internet]. 2019 [cited 2020  
663 May 1]. Available from:  
664 [https://www.ons.gov.uk/peoplepopulationandcommunity/populationandmigration/populati](https://www.ons.gov.uk/peoplepopulationandcommunity/populationandmigration/populationestimates/bulletins/annualmidyearpopulationestimates/mid2018)  
665 [onestimates/bulletins/annualmidyearpopulationestimates/mid2018](https://www.ons.gov.uk/peoplepopulationandcommunity/populationandmigration/populationestimates/bulletins/annualmidyearpopulationestimates/mid2018)
- 666 24. The Met Office [Internet]. 2020 [cited 2020 May 6]. Available from:

- 667 <https://www.metoffice.gov.uk/>
- 668 25. Office for National Statistics. Local Authority Districts (December 2017) Full Clipped  
669 Boundaries in Great Britain | Open Geography portal [Internet]. 2017 [cited 2020 May 6].  
670 Available from:  
671 [http://geoportal.statistics.gov.uk/datasets/ae90afc385c04d869bc8cf8890bd1bcd\\_1](http://geoportal.statistics.gov.uk/datasets/ae90afc385c04d869bc8cf8890bd1bcd_1)
- 672 26. Dark Sky application programming interface (API) by Apple [Internet]. 2020 [cited 2020 May  
673 6]. Available from: <https://darksky.net/dev>
- 674 27. Department for Environment Food and Rural Affairs (Defra) webmaster@defra.gsi.gov.uk. Modelled  
675 background pollution data- Defra, UK.
- 676 28. Office for National Statistics. 2011 Census [Internet]. [cited 2020 May 6]. Available from:  
677 <https://www.ons.gov.uk/census/2011census>
- 678 29. National Records of Scotland. 2011 Census results | Scotland's Census [Internet]. [cited 2020  
679 May 6]. Available from: <https://www.scotlandscensus.gov.uk/census-results>
- 680 30. English indices of deprivation 2019 - GOV.UK [Internet]. [cited 2020 May 6]. Available from:  
681 <https://www.gov.uk/government/statistics/english-indices-of-deprivation-2019>
- 682 31. Scottish Index of Multiple Deprivation 2020 - gov.scot [Internet]. [cited 2020 May 6].  
683 Available from: [https://www.gov.scot/collections/scottish-index-of-multiple-deprivation-  
684 2020/](https://www.gov.scot/collections/scottish-index-of-multiple-deprivation-2020/)
- 685 32. Welsh Index of Multiple Deprivation 2019 - gov.wales [Internet]. [cited 2020 May 6].  
686 Available from: [https://stats.wales.gov.wales/Catalogue/Community-Safety-and-Social-  
687 Inclusion/Welsh-Index-of-Multiple-Deprivation/WIMD-2019](https://stats.wales.gov.wales/Catalogue/Community-Safety-and-Social-Inclusion/Welsh-Index-of-Multiple-Deprivation/WIMD-2019)
- 688 33. House of Commons Library. Social care: market – structure, issues, and cross-subsidisation  
689 (England) [Internet]. 2018. Available from:

- 690 <https://researchbriefings.files.parliament.uk/documents/CBP-8003/CBP-8003.pdf>
- 691 34. NHS Scotland. Care Home Census for Adults in Scotland [Internet]. 2017 [cited 2020 May 6].  
692 Available from: [http://www.isdscotland.org/Health-Topics/Health-and-Social-Community-](http://www.isdscotland.org/Health-Topics/Health-and-Social-Community-Care/Publications/2018-09-11/SCHC_mar17_tables.xlsx?)  
693 [Care/Publications/2018-09-11/SCHC\\_mar17\\_tables.xlsx?](http://www.isdscotland.org/Health-Topics/Health-and-Social-Community-Care/Publications/2018-09-11/SCHC_mar17_tables.xlsx?)
- 694 35. Moultrie K, Rattle N, Williams E. The Care Home Market in Wales: Mapping the Sector  
695 [Internet]. 2015 [cited 2020 May 6]. Available from:  
696 <http://www.nationalarchives.gov.uk/doc/open-government-licence/version/3>.
- 697 36. Public Health England. Public Health Profiles [Internet]. [cited 2020 May 6]. Available from:  
698 <https://fingertips.phe.org.uk/>
- 699 37. gpcontract.co.uk. Scotland - QOF Database [Internet]. 2015 [cited 2020 May 6]. Available  
700 from:  
701 <https://web.archive.org/web/20160229003924/http://www.gpcontract.co.uk/browse/SCO/1>  
702 5
- 703 38. Welsh Government. StatsWales [Internet]. [cited 2020 May 6]. Available from:  
704 <https://statswales.gov.wales/Catalogue>
- 705 39. British Health Foundation, Institute of Applied Health Research: University of Birmingham.  
706 Heart and Circulatory Disease Statistics 2019 [Internet]. 2019. Available from:  
707 [https://www.bhf.org.uk/-/media/files/research/heart-statistics/bhf-statistics-compendium-](https://www.bhf.org.uk/-/media/files/research/heart-statistics/bhf-statistics-compendium-2019-final.pdf)  
708 [2019-final.pdf](https://www.bhf.org.uk/-/media/files/research/heart-statistics/bhf-statistics-compendium-2019-final.pdf)
- 709 40. Scottish Government. Scottish Health Survey [Internet]. 2018 [cited 2020 May 6]. Available  
710 from: <https://scotland.shinyapps.io/sg-scottish-health-survey/>
- 711 41. Health status, illnesses, and other conditions (Welsh Health Survey): 2015 | GOV.WALES  
712 [Internet]. [cited 2020 May 6]. Available from: [https://gov.wales/health-status-illnesses-and-](https://gov.wales/health-status-illnesses-and-other-conditions-welsh-health-survey-2015)  
713 [other-conditions-welsh-health-survey-2015](https://gov.wales/health-status-illnesses-and-other-conditions-welsh-health-survey-2015)

- 714 42. 2018 Passenger survey report | UK Civil Aviation Authority [Internet]. [cited 2020 May 6].  
715 Available from: [https://www.caa.co.uk/Data-and-analysis/UK-aviation-market/Consumer-](https://www.caa.co.uk/Data-and-analysis/UK-aviation-market/Consumer-research/Departing-passenger-survey/2018-Passenger-survey-report/)  
716 [research/Departing-passenger-survey/2018-Passenger-survey-report/](https://www.caa.co.uk/Data-and-analysis/UK-aviation-market/Consumer-research/Departing-passenger-survey/2018-Passenger-survey-report/)
- 717 43. Port and domestic waterborne freight statistics: data tables (PORT) - GOV.UK [Internet].  
718 [cited 2020 May 6]. Available from: [https://www.gov.uk/government/statistical-data-](https://www.gov.uk/government/statistical-data-sets/port-and-domestic-waterborne-freight-statistics-port)  
719 [sets/port-and-domestic-waterborne-freight-statistics-port](https://www.gov.uk/government/statistical-data-sets/port-and-domestic-waterborne-freight-statistics-port)
- 720 44. Coronavirus - Explore - Google Trends [Internet]. [cited 2020 May 6]. Available from:  
721 [https://trends.google.com/trends/explore?date=2020-02-01 2020-03-](https://trends.google.com/trends/explore?date=2020-02-01%2020-03-19&geo=GB&q=Coronavirus)  
722 [19&geo=GB&q=Coronavirus](https://trends.google.com/trends/explore?date=2020-02-01%2020-03-19&geo=GB&q=Coronavirus)
- 723 45. Green SB. How Many Subjects Does It Take To Do A Regression Analysis? *Multivariate Behav*  
724 *Res.* 1991 Jul 1;26(3):499–510.
- 725 46. Faul F, Erdfelder E, Lang AG, Buchner A. G\*Power 3: A flexible statistical power analysis  
726 program for the social, behavioral, and biomedical sciences. In: *Behavior Research Methods.*  
727 *Psychonomic Society Inc.*; 2007. p. 175–91.
- 728 47. Rubin DB, Wiley J, York N, Brisbane C, Singapore T. *Multiple Imputation for Nonresponse in*  
729 *Surveys.* 1987.
- 730 48. R Core Team. *R: A language and environment for statistical computing.* [Internet]. Vienna,  
731 Austria.: R Foundation for Statistical Computing; 2019. Available from: [https://www.r-](https://www.r-project.org/)  
732 [project.org/](https://www.r-project.org/)
- 733 49. Robinson D, Hayes A. *broom: Convert Statistical Analysis Objects into Tidy Tibbles.* 2019.
- 734 50. Fox J, Weisberg S. *An R Companion to Applied Regression.* Third Edit. Thousand Oaks, CA:  
735 SAGE; 2019.
- 736 51. van Buuren S, Groothuis-Oudshoorn K. *mice: Multivariate Imputation by Chained Equations in*

- 737 R. J Stat Softw [Internet]. 2011;45(3):1–67. Available from:  
738 <https://www.jstatsoft.org/v45/i03/>
- 739 52. Hothorn T, Bretz F, Westfall P. Simultaneous inference in general parametric models. Vol. 50,  
740 Biometrical Journal. Biom J; 2008. p. 346–63.
- 741 53. Henningsen A, Hamann JD. Systemfit: A package for estimating systems of simultaneous  
742 equations in R. J Stat Softw. 2007 Dec;23(4):1–40.
- 743 54. Kowarik A, Templ M. Imputation with the R package VIM. J Stat Softw. 2016 Oct 20;74(1):1–  
744 16.
- 745 55. Griffith G, Morris TT, Tudball M, Herbert A, Mancano G, Pike L, et al. Collider bias undermines  
746 our understanding of COVID-19 disease risk and severity. medRxiv [Internet]. 2020 May 8  
747 [cited 2020 May 14];2020.05.04.20090506. Available from:  
748 <https://www.medrxiv.org/content/10.1101/2020.05.04.20090506v1>
- 749 56. Mostafavi N, Vlaanderen J, Chadeau-Hyam M, Beelen R, Modig L, Palli D, et al. Inflammatory  
750 markers in relation to long-term air pollution. Environ Int. 2015;81:1–7.
- 751 57. Araujo MB, Naimi B. Spread of SARS-CoV-2 Coronavirus likely to be constrained by climate.  
752 medRxiv. 2020 Apr;2020.03.12.20034728.
- 753 58. Sutton D, Fuchs K, D’Alton M, Goffman D. Universal Screening for SARS-CoV-2 in Women  
754 Admitted for Delivery. N Engl J Med. 2020 Apr;NEJMc2009316.
- 755 59. Wenham C, Smith J, Morgan R, Gender and COVID-19 Working Group. COVID-19: the  
756 gendered impacts of the outbreak. Lancet (London, England). 2020 Mar;395(10227):846–8.
- 757 60. Petrilli CM, Jones SA, Yang J, Rajagopalan H, O’Donnell LF, Chernyak Y, et al. Factors  
758 associated with hospitalization and critical illness among 4,103 patients with COVID-19  
759 disease in New York City. medRxiv. 2020 Apr;2020.04.08.20057794.

- 760 61. Miyara M, Tubach F, POURCHER V, Morelot-Panzini C, Pernet J, Haroche J, et al. Low  
761 incidence of daily active tobacco smoking in patients with symptomatic COVID-19. *Qeios*.  
762 2020 Apr;
- 763 62. Berkowitz L, Schultz BM, Salazar GA, Pardo-Roa C, Sebastián VP, Álvarez-Lobos MM, et al.  
764 Impact of Cigarette Smoking on the Gastrointestinal Tract Inflammation: Opposing Effects in  
765 Crohn's Disease and Ulcerative Colitis. *Front Immunol*. 2018 Jan;9:74.
- 766 63. Ruan Q, Yang K, Wang W, Jiang L, Song J. Clinical predictors of mortality due to COVID-19  
767 based on an analysis of data of 150 patients from Wuhan, China [Internet]. *Intensive Care*  
768 *Medicine*. Nature Publishing Group; 2020 [cited 2020 May 3]. p. 1. Available from:  
769 <https://www.ncbi.nlm.nih.gov/pmc/articles/PMC7080116/>
- 770 64. Ritchie H, Roser M, Ortiz-Ospina E, Hasell J. Excess mortality from the Coronavirus pandemic  
771 (COVID-19) [Internet]. *Our World in Data*. 2020 [cited 2020 May 14]. Available from:  
772 <https://ourworldindata.org/excess-mortality-covid>
- 773 65. Scottish Government. National Clinical and Practice Guidance for Adult Care Homes in  
774 Scotland during the COVID-19 Pandemic. 2020;1–42. Available from:  
775 [https://www.gov.scot/binaries/content/documents/govscot/publications/advice-and-](https://www.gov.scot/binaries/content/documents/govscot/publications/advice-and-guidance/2020/03/coronavirus-covid-19-clinical-and-practice-guidance-for-adult-care-homes/documents/clinical-guidance-for-nursing-home-and-residential-care-residents/clinical-)  
776 [guidance/2020/03/coronavirus-covid-19-clinical-and-practice-guidance-for-adult-care-](https://www.gov.scot/binaries/content/documents/govscot/publications/advice-and-guidance/2020/03/coronavirus-covid-19-clinical-and-practice-guidance-for-adult-care-homes/documents/clinical-guidance-for-nursing-home-and-residential-care-residents/clinical-)  
777 [homes/documents/clinical-guidance-for-nursing-home-and-residential-care-](https://www.gov.scot/binaries/content/documents/govscot/publications/advice-and-guidance/2020/03/coronavirus-covid-19-clinical-and-practice-guidance-for-adult-care-homes/documents/clinical-guidance-for-nursing-home-and-residential-care-residents/clinical-)  
778 [residents/clinical-](https://www.gov.scot/binaries/content/documents/govscot/publications/advice-and-guidance/2020/03/coronavirus-covid-19-clinical-and-practice-guidance-for-adult-care-homes/documents/clinical-guidance-for-nursing-home-and-residential-care-residents/clinical-)
- 779 66. Khunti K, Singh AK, Pareek M, Hanif W. Is ethnicity linked to incidence or outcomes of covid-  
780 19? *BMJ* [Internet]. 2020 Apr 20 [cited 2020 May 8];369. Available from:  
781 <https://www.bmj.com/content/369/bmj.m1548>
- 782 67. Pareek M, Bangash MN, Pareek N, Pan D, Sze S, Minhas JS, et al. Ethnicity and COVID-19: an  
783 urgent public health research priority. *Lancet* [Internet]. 2020 May 2 [cited 2020 May

- 784 3];395(10234):1421–2. Available from:  
785 [https://www.thelancet.com/journals/lancet/article/PIIS0140-6736\(20\)30922-3/fulltext](https://www.thelancet.com/journals/lancet/article/PIIS0140-6736(20)30922-3/fulltext)
- 786 68. Li S, Hua X. The closer to the Europe Union headquarters, the higher risk of COVID-19?  
787 Cautions regarding ecological studies of COVID-19. medRxiv. 2020  
788 May;2020.04.23.20077008.
- 789 69. Pearce N. The ecological fallacy strikes back. J Epidemiol Community Health. 2000  
790 May;54(5):326–7.
- 791 70. Abel GA, Barclay ME, Payne RA. Adjusted indices of multiple deprivation to enable  
792 comparisons within and between constituent countries of the UK including an illustration  
793 using mortality rates. BMJ Open [Internet]. 2016 Nov 1 [cited 2020 May 14];6(11):e012750.  
794 Available from: <https://bmjopen.bmj.com/content/6/11/e012750>
- 795 71. Feldmann M, Maini RN, Woody JN, Holgate ST, Winter G, Rowland M, et al. Trials of anti-  
796 tumour necrosis factor therapy for COVID-19 are urgently needed. Lancet [Internet]. 2020  
797 May 2 [cited 2020 May 17];395(10234):1407–9. Available from:  
798 [https://www.thelancet.com/journals/lancet/article/PIIS0140-6736\(20\)30858-8/fulltext](https://www.thelancet.com/journals/lancet/article/PIIS0140-6736(20)30858-8/fulltext)
- 799
- 800

# COVID-19 Deaths Per 100,000 People

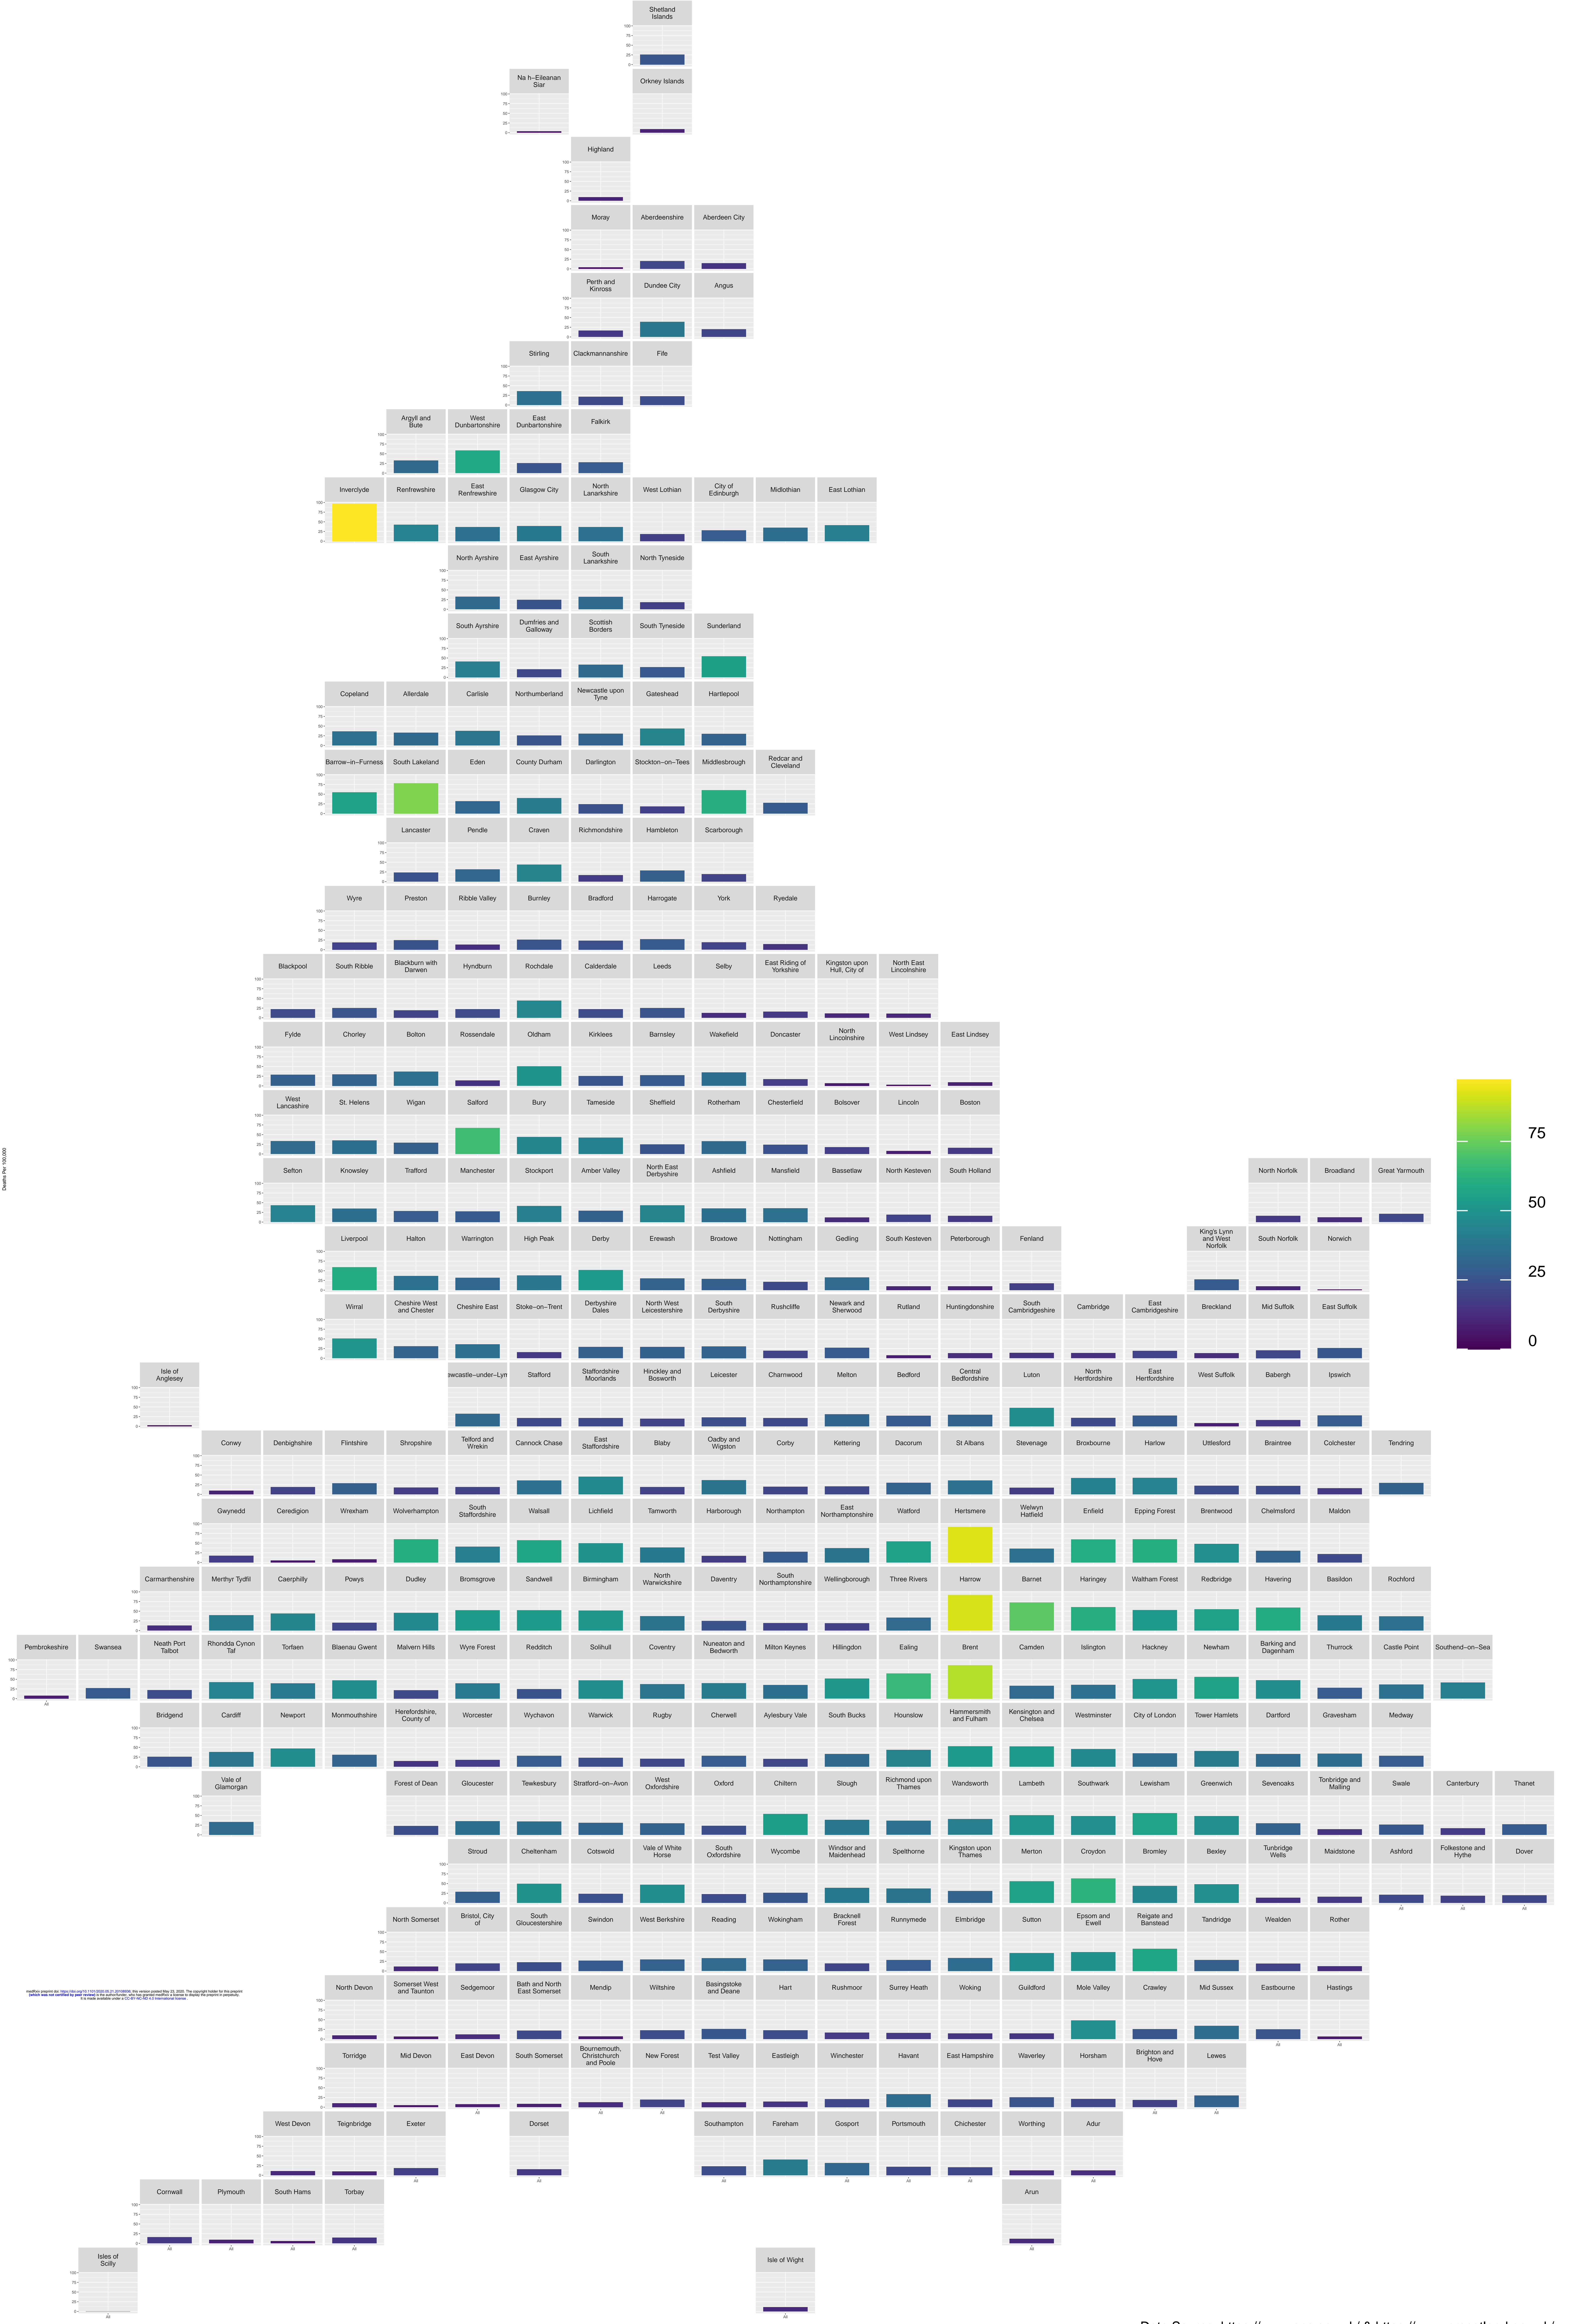

Data Source: <https://www.ons.gov.uk/> & <https://www.nrscotland.gov.uk/>



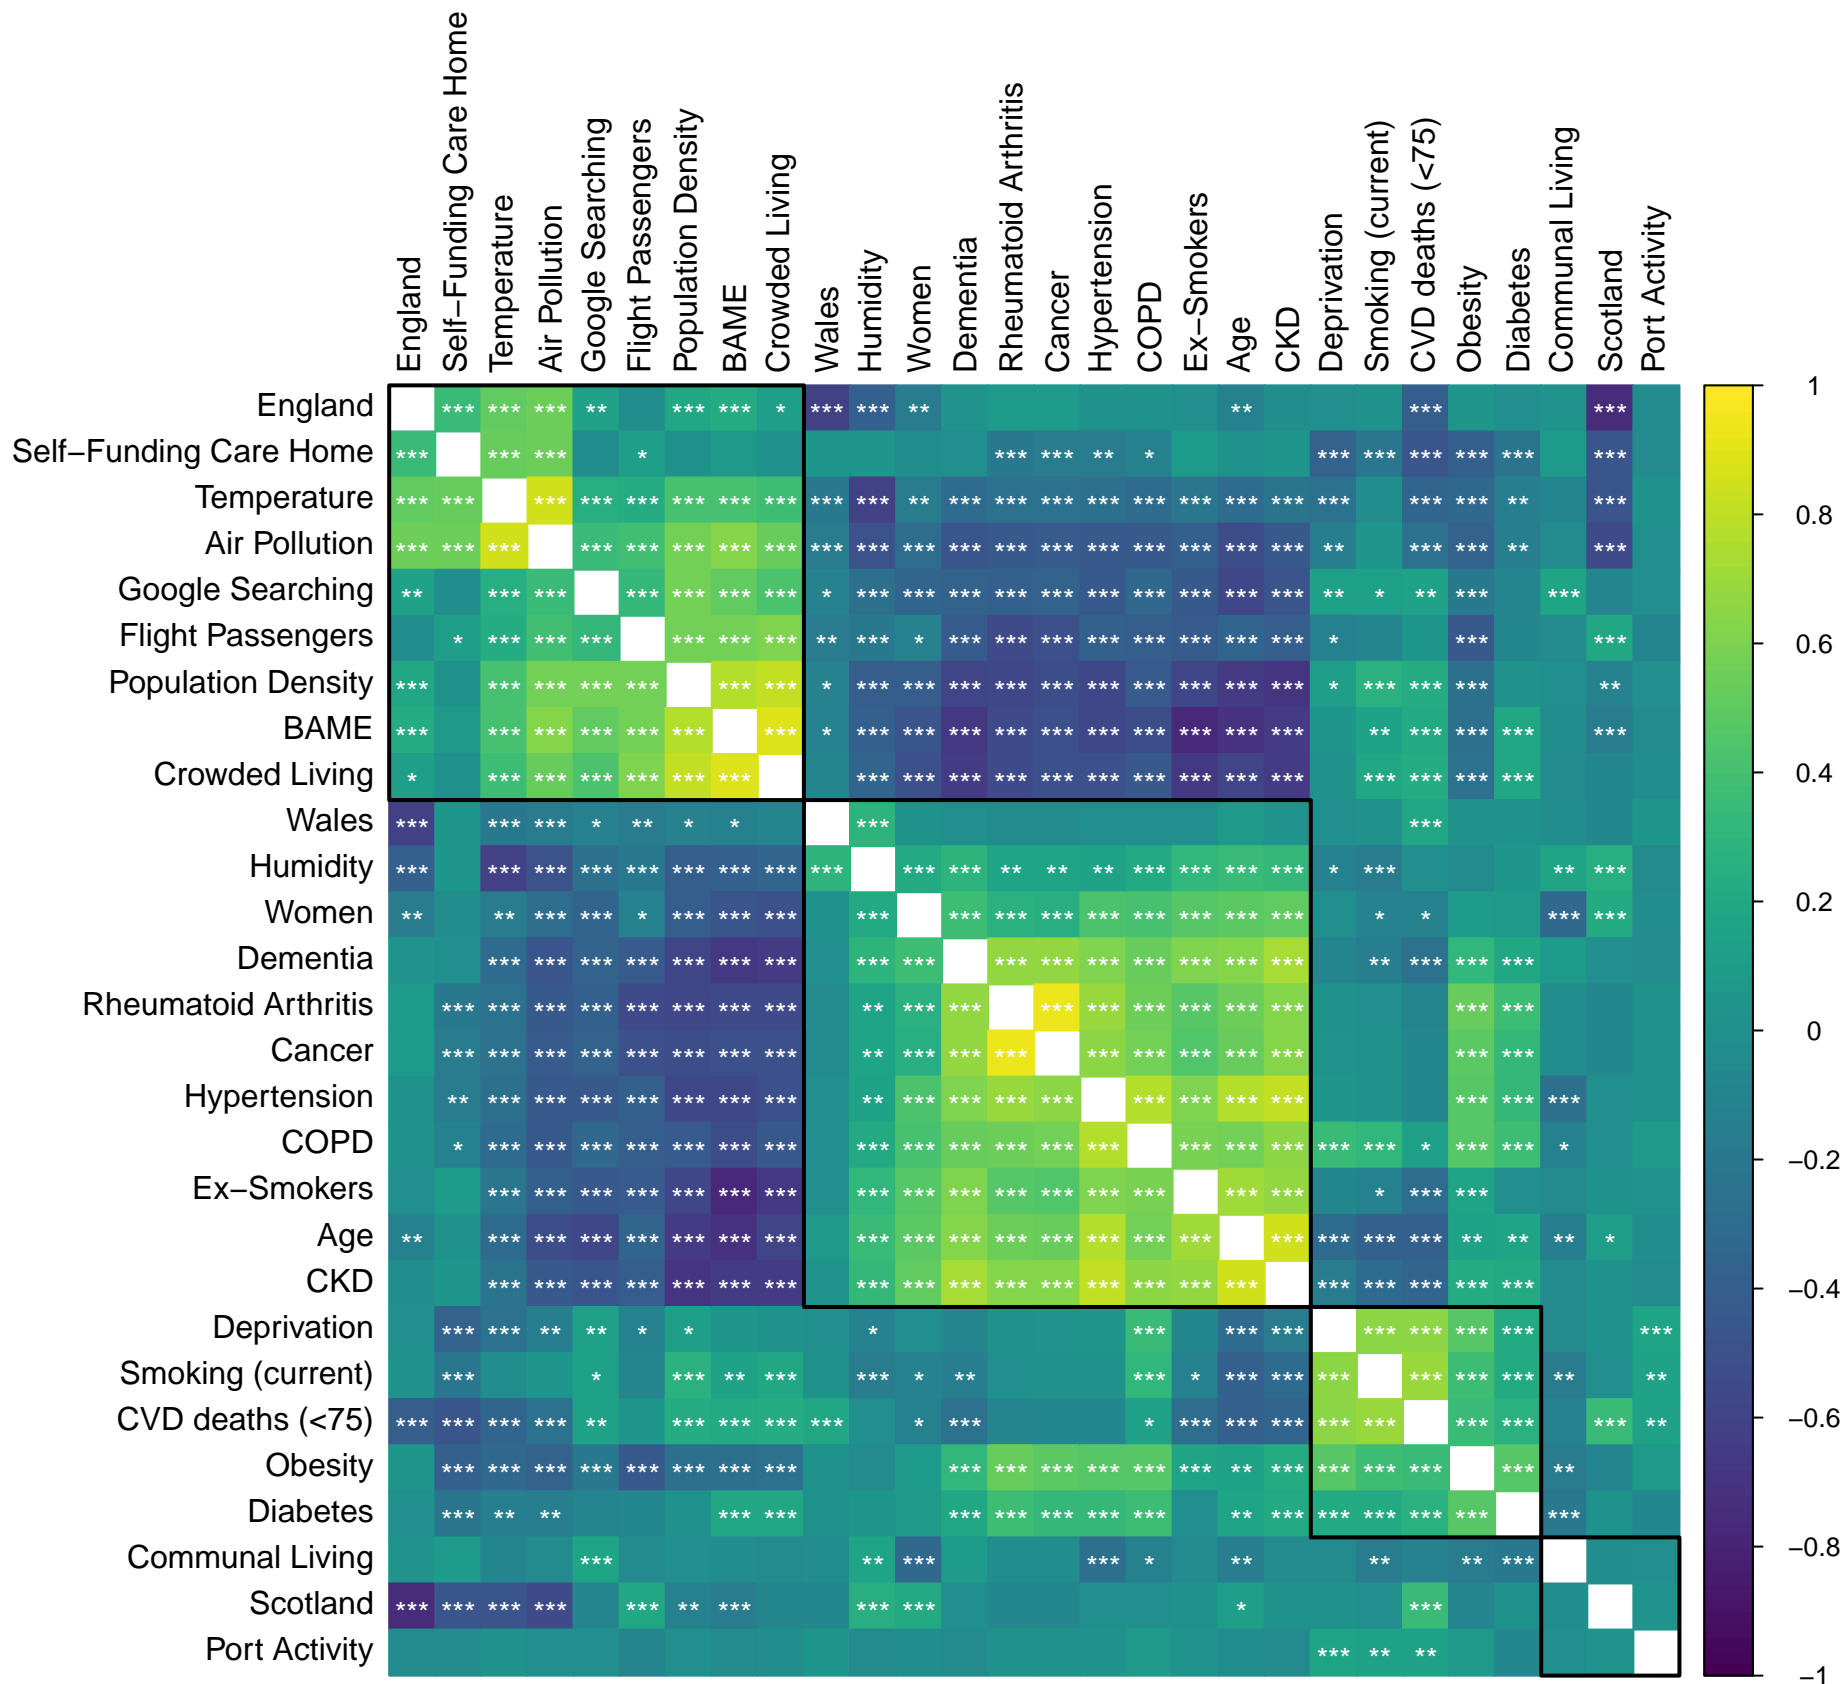

# Local Authority Covid-19 Deaths per 100,000 in All Settings

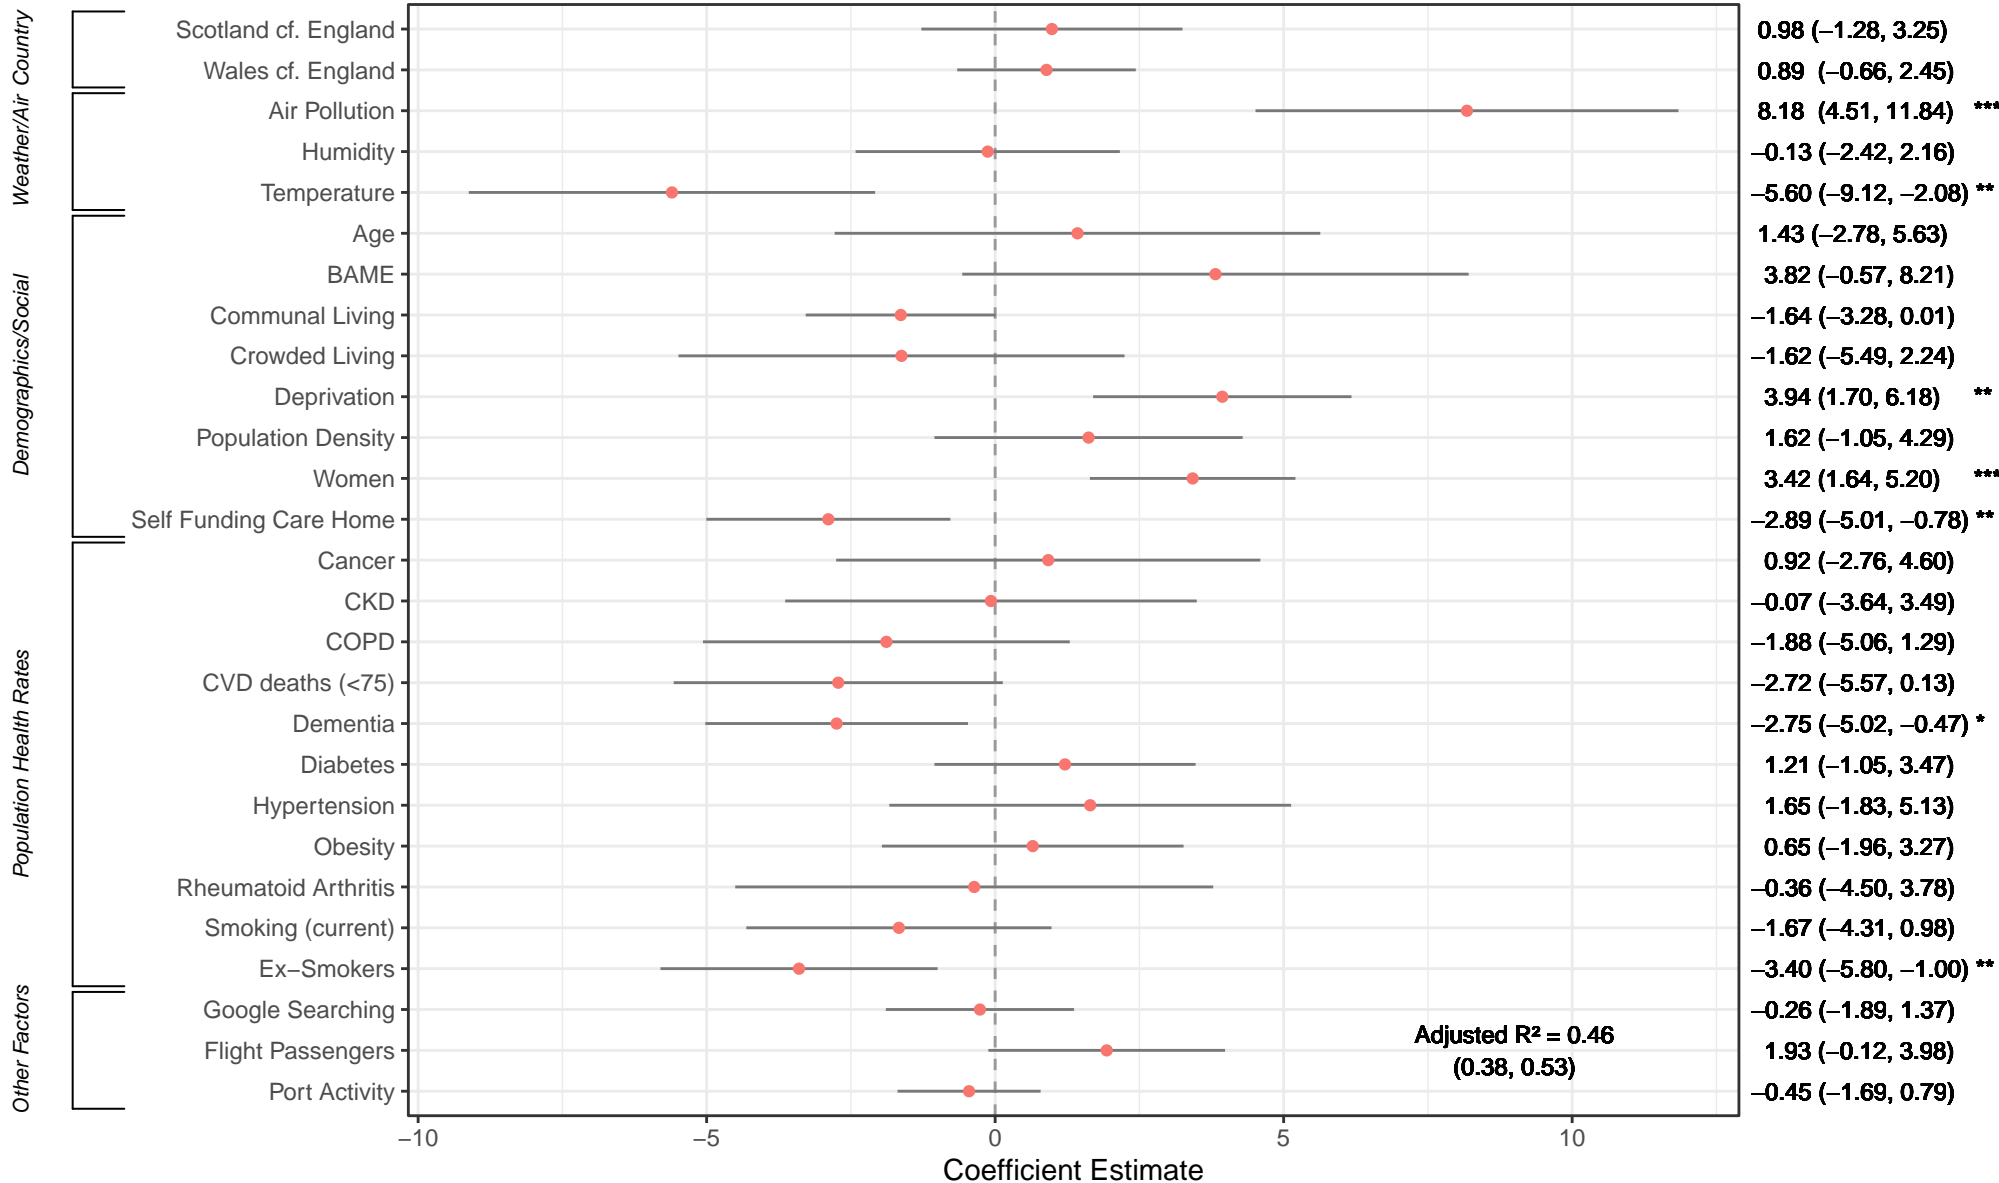

# Local Authority All Deaths (except COVID-19) per 100,000 in All Settings

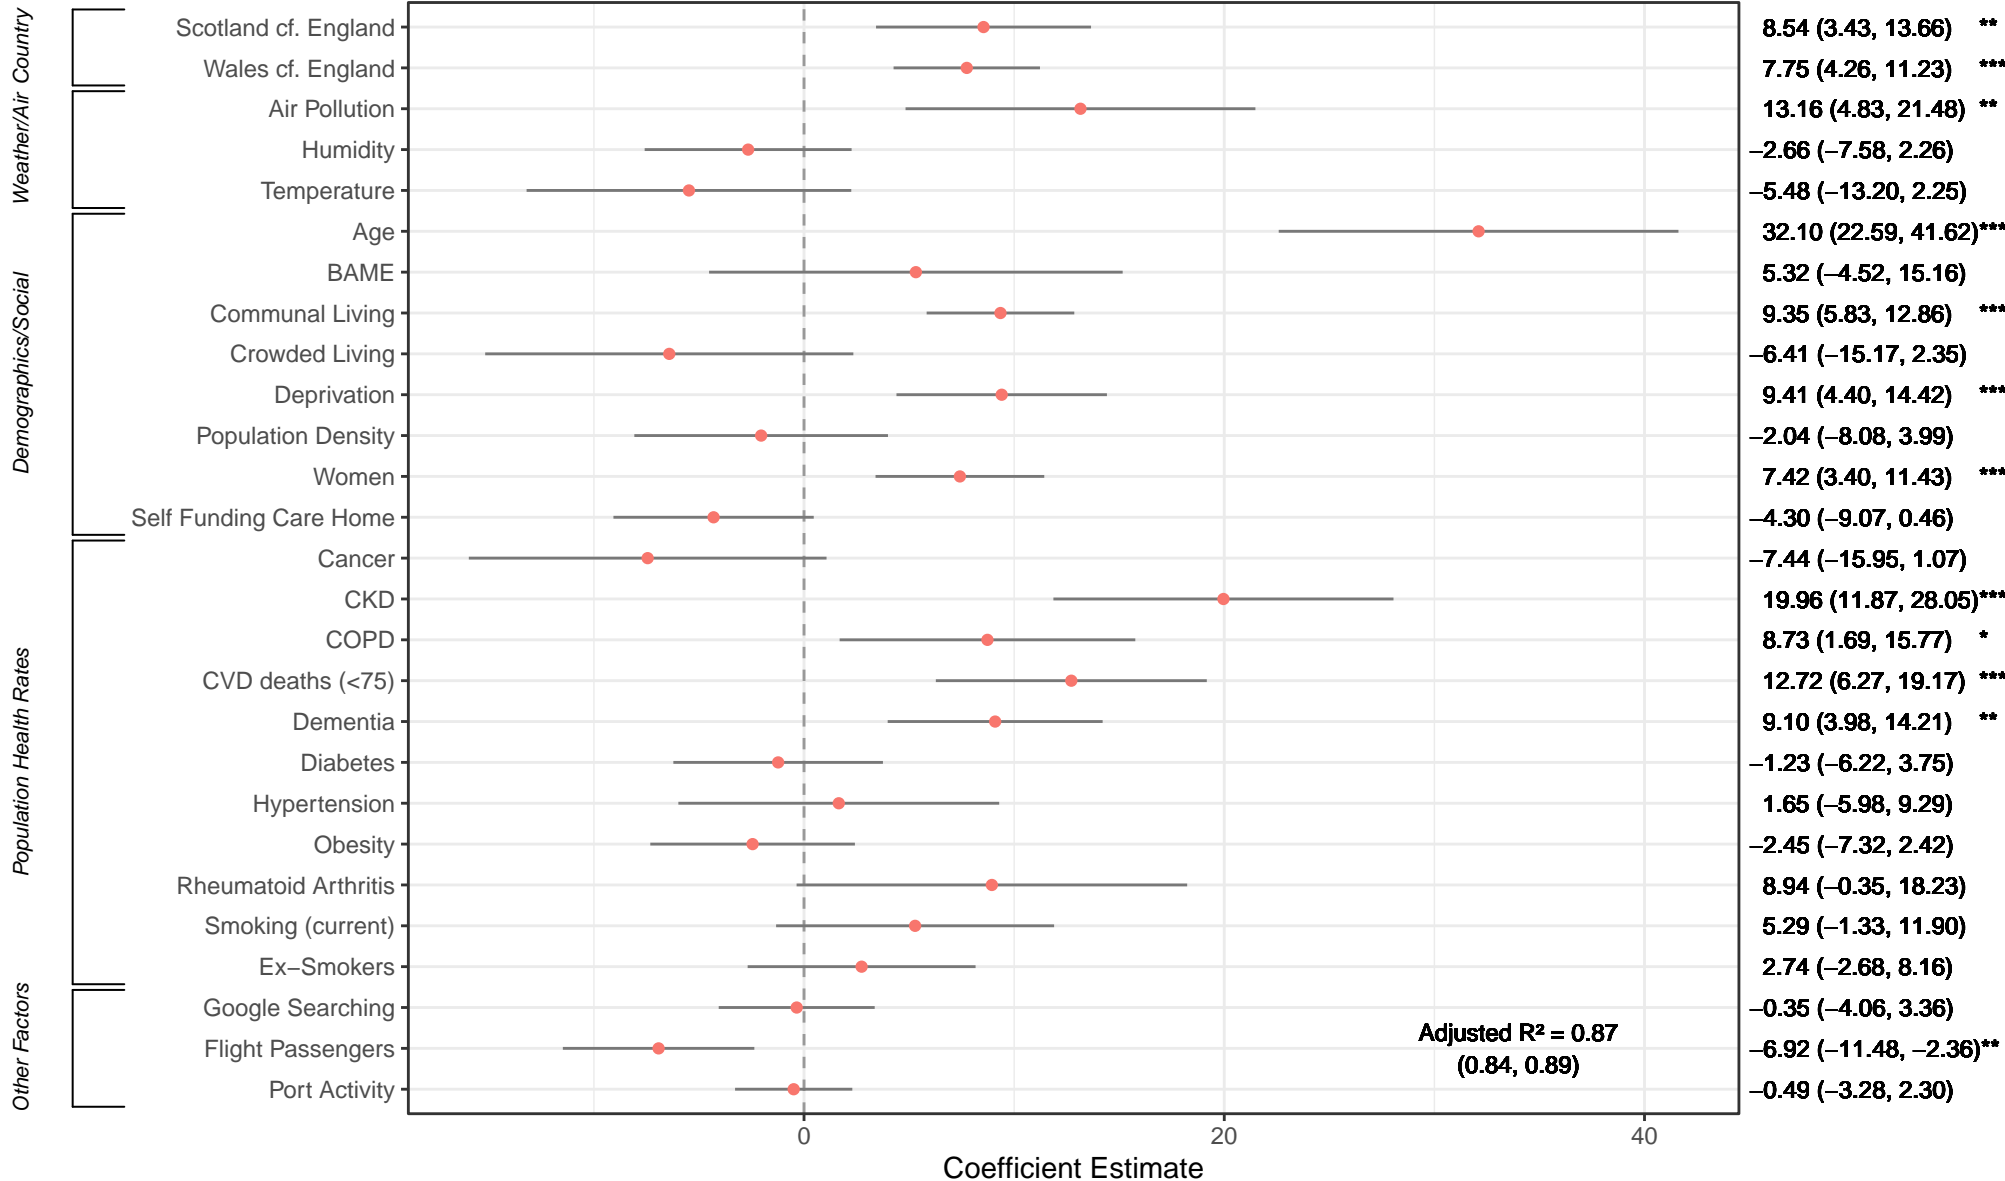

Source: https://medrxiv.org/content/10.1101/2020.05.21.20108936v1.full.pdf
